# Supplementary material for: Visible-light-induced alkoxycarbonylation/cyclization of 1,7-enynes: synthesis of dihydropyranones containing all-carbon quaternary centers
Source: Royal Society of Chemistry journal article supplement (doi:10.1039/d3qo00213f), 2023-01-01
Supplement: d3qo00213f1.pdf [file d3qo00213f1.pdf]

## Supporting Information

### **Visible-light-induced alkoxyacylation/cyclization of 1,7-enynes: synthesis of dihydropyranones containing all-carbon quaternary centers**

Jian-Qiang Chen,<sup>a</sup> Qi Chen,<sup>a</sup> Baofu Chen<sup>\*a</sup> and Jie Wu<sup>\*a,b,c</sup>

<sup>a</sup>Taizhou Central Hospital (Taizhou University Hospital) & School of Pharmaceutical and Materials Engineering, Taizhou University, 999 Donghai Avenue, Taizhou, 318000, China.

<sup>b</sup>State Key Laboratory of Organometallic Chemistry, Shanghai Institute of Organic Chemistry, Chinese Academy of Sciences, Shanghai 200032, China.

<sup>c</sup>School of Chemistry and Chemical Engineering, Henan Normal University, Xinxiang 453007, China.

Corresponding author: chenbf@tzc.edu.cn; jie\_wu@fudan.edu.cn

## Contents

|                                                             |    |
|-------------------------------------------------------------|----|
| 1. General information.....                                 | 2  |
| 2. General experimental procedure.....                      | 3  |
| 3. General procedure for dihydropyranone.....               | 5  |
| 4. Synthetic applications.....                              | 6  |
| 5. Devices for the photocatalytic reactions.....            | 8  |
| 6. Mechanistic study.....                                   | 9  |
| 7. X-ray data for compound <b>3e</b> (CCDC 2203307).....    | 10 |
| 8. Characterization of new substrates and all products..... | 11 |
| 9. References.....                                          | 20 |
| 10. NMR spectra of compounds.....                           | 21 |

## 1. General information

All glassware was thoroughly oven-dried. Chemicals and solvents were either purchased from commercial suppliers or purified by standard techniques. Thin-layer chromatography plates were visualized by exposure to ultraviolet light and/or staining with phosphomolybdic acid followed by heating on a hot plate. Flash chromatography was carried out using silica gel (200–300 mesh).  $^1\text{H}$  NMR and  $^{13}\text{C}$  NMR spectra were recorded on a Bruker AM-400 (400 MHz). The spectra were recorded in deuteriochloroform ( $\text{CDCl}_3$ ) as solvent at room temperature,  $^1\text{H}$  and  $^{13}\text{C}$  NMR chemical shifts are reported in ppm relative to the residual solvent peak. The residual solvent signals were used as references and the chemical shifts were converted to the TMS scale ( $\text{CDCl}_3$ :  $\delta_{\text{H}} = 7.26$  ppm,  $\delta_{\text{C}} = 77.0$  ppm). Data for  $^1\text{H}$  NMR are reported as follows: chemical shift ( $\delta$  ppm), multiplicity (s = singlet, d = doublet, t = triplet, m = multiplet, dd = doublet, br = broad), integration, coupling constant (Hz) and assignment. Data for  $^{13}\text{C}$  NMR are reported as chemical shift. Electrospray-ionisation HRMS data were acquired on a Q-TOF mass spectrometer (Waters SYNAPT G2-Si) LC-MS TOF.

## 2. General experimental procedure

### 1. General procedure for the synthesis of substrates 1a-1r and 1t-1w.<sup>1</sup>

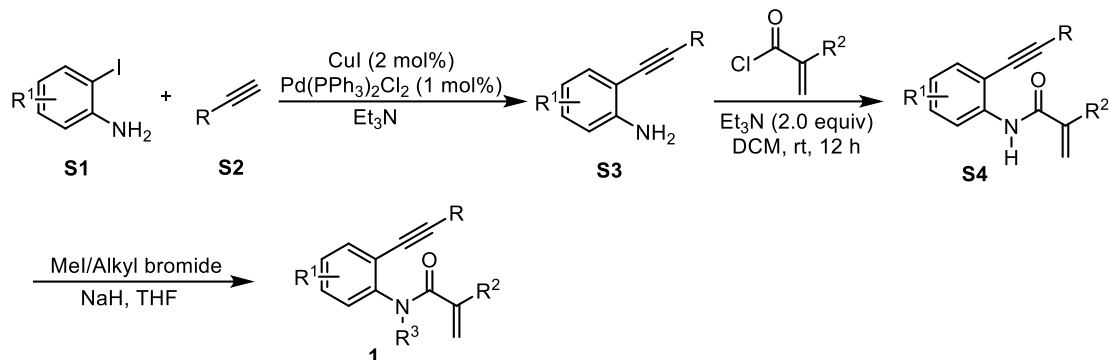

Preparation of the compound (**S3**): Nitrogen was bubbled through neat triethylamine (50 mL) for 20 min. Aryl iodide **S1** (20 mmol), Pd(PPh<sub>3</sub>)<sub>2</sub>Cl<sub>2</sub> (280.8 mg, 0.4 mmol, 2 mol%), CuI (152.4 mg, 0.8 mmol, 4 mol%) and terminal acetylene **S2** (24 mmol) were solubilized in triethylamine. The resulting mixture was stirred at room temperature for 2 h under N<sub>2</sub> atmosphere. Then the crude mixture was filtered through a shot pad of celite and washed with DCM (20 mL) for three times, and the combined organic layer was concentrated under reduced pressure. The resulting crude mixture was purified by flash chromatography using ethyl acetate and petroleum ether as eluent to afford the desired product **S3**.

Preparation of the compound (**S4**): In a 100 mL flask with a stir-bar was charged with **S3** (10 mmol, 1.0 equiv) in DCM (0.5 M). The solution was stirred at 0 °C, triethylamine (2.0 g, 20 mmol, 2.0 equiv) and acryloyl chloride (15 mmol, 1.5 equiv) was added. The solution was warmed up to room temperature and stirred at room temperature for 12 h. The mixture was diluted with DCM (50 mL) and saturated NH<sub>4</sub>Cl solution (50 mL). The organic and aqueous layers were separated. The aqueous layer was extracted with DCM (50 mL x 3). The combined organic layer was washed with brine, dried over Na<sub>2</sub>SO<sub>4</sub>, filtered and concentrated in vacuo to give a residue, which was purified by flash chromatography and then recrystallized from PE/EtOAc to afford the products **S4**.

Preparation of the compound (**1**): Compound **S4** (5 mmol) was solubilized in THF

(20 mL) under N<sub>2</sub> atmosphere. NaH 60% (300 mg, 7.5 mmol) was added portionwise at 0 °C. MeI (778 μL, 12.5 mmol), EtI (1.0 mL, 12.5 mmol), allyl bromide (1.08 mL, 12.5 mmol) or BrBn (1.48 mL, 12.5 mmol) were added dropwise. The resulting mixture was stirred at room temperature for 3 h under N<sub>2</sub> atmosphere. The reaction mixture was quenched with H<sub>2</sub>O (40 mL). THF was removed under reduced pressure. The aqueous layer was extracted with EtOAc (3 x 30 mL). The combined organic layers were washed with brine (30 mL) and dried over MgSO<sub>4</sub>. The crude material was concentrated under reduced pressure and purified by flash column chromatography on silica gel (1:4, EtOAc/hexane).

## 2. General procedure for the synthesis of substrates 1s.<sup>2</sup>

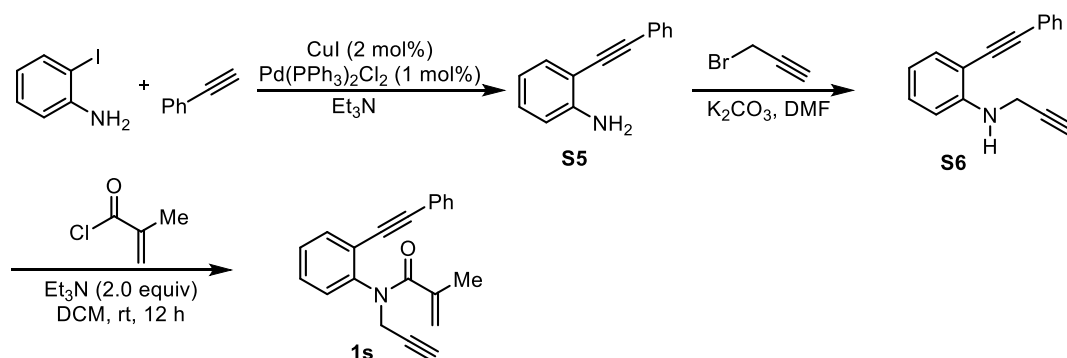

Preparation of the compound (**S5**): Nitrogen was bubbled through neat triethylamine (50 mL) for 20 min. 2-iodoaniline (10 mmol), Pd(PPh<sub>3</sub>)<sub>2</sub>Cl<sub>2</sub> (140.4 mg, 0.2 mmol, 2 mol%), CuI (76.2 mg, 0.4 mmol, 4 mol%) and phenylacetylene (12 mmol) were solubilized in triethylamine. The resulting mixture was stirred at room temperature for 2 h under N<sub>2</sub> atmosphere. Then the crude mixture was filtered through a shot pad of celite and washed with DCM (10 mL) for three times, and the combined organic layer was concentrated under reduced pressure. The resulting crude mixture was purified by flash chromatography using ethyl acetate and petroleum ether as eluent to afford the desired product **S5**.

Preparation of the compound (**S6**): To a mixture of **S5** (963 mg, 5 mmol) and potassium carbonate (1.38 g, 10 mmol) in DMF (12 mL) was added propargyl bromide (1.19 g, 10 mmol) under argon atmosphere at room temperature. The resulting mixture was stirred at ambient temperature overnight. Water (12 mL) was added and the mixture was extracted by dichloromethane for 3 times (20 mL×3). The collected organic phases

were dried over magnesium sulfate, then concentrated and purified by silica gel column chromatography (eluent: petrol ether/ ethyl acetate = 75:1) to afford product **S6**.

Preparation of the compound (**1s**): In a 100 mL flask with a stir-bar was charged with **S6** (2 mmol, 1.0 equiv) in DCM (0.5 M). The solution was stirred at 0 °C, triethylamine (405 mg, 4 mmol, 2.0 equiv) and methacryloyl chloride (3 mmol, 1.5 equiv) was added. The solution was warmed up to room temperature and stirred at room temperature for 12 h. The mixture was diluted with DCM (10 mL) and saturated NH<sub>4</sub>Cl solution (10 mL). The organic and aqueous layers were separated. The aqueous layer was extracted with DCM (10 mL x 3). The combined organic layer was washed with brine, dried over Na<sub>2</sub>SO<sub>4</sub>, filtered and concentrated in vacuo to give a residue, which was purified by flash chromatography and then recrystallized from PE/EtOAc to afford the products **1s**.

### 3. General procedure for dihydropyranone

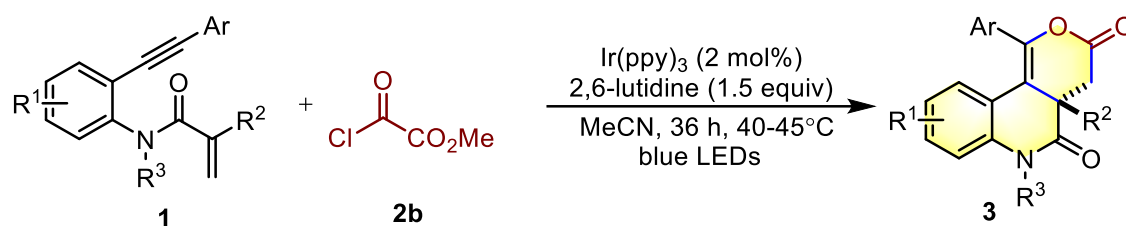

All optimization reactions were set up in a glove box under N<sub>2</sub> atmosphere. Substrate **1** (0.2 mmol, 1.0 equiv), methyl chlorooxoacetate **2b** (0.6 mmol, 3.0 equiv) and 2,6-lutidine (0.3 mmol, 1.5 equiv) were added to a solution of photocatalyst Ir(ppy)<sub>3</sub> (2 mol %) in dry MeCN (4 mL) at room temperature. The heterogenous mixture was placed in the irradiation apparatus equipped with blue LEDs. The resulting mixture was stirred for 36 h. Upon completion of the reaction, the mixture was diluted with ethyl acetate (30 mL), washed with brine (10 ml x 2), dried with Na<sub>2</sub>SO<sub>4</sub> and the solvent was evaporated. The crude product was purified by column chromatography on silica gel to afford the desired product **3**.

## 4. Synthetic applications

### 1. General procedure for the synthesis of 3d-I

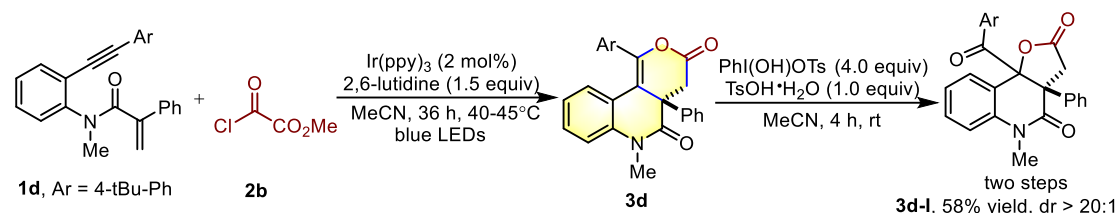

All optimization reactions were set up in a glove box under N<sub>2</sub> atmosphere. Substrate **1d** (0.2 mmol, 1.0 equiv), methyl chlorooxoacetate **2b** (0.6 mmol, 3.0 equiv) and 2,6-lutidine (0.3 mmol, 1.5 equiv) were added to a solution of photocatalyst Ir(ppy)<sub>3</sub> (2 mol %) in dry MeCN (4 mL) at room temperature. The heterogenous mixture was placed in the irradiation apparatus equipped with blue LEDs. The resulting mixture was stirred for 36 h. Upon completion of the reaction, the mixture was diluted with methyl acetate (30 mL), washed with brine (10 x 3 mL), dried with Na<sub>2</sub>SO<sub>4</sub>. After evaporation of the solvent, the crude product was used in the following step without further purification. To a solution of crude product in MeCN (4.0 mL) was added *p*-TsOH·H<sub>2</sub>O (0.2 mmol, 1.0 equiv) and [(hydroxy)-tosyloxyiodo]benzene (0.8 mmol, 4.0 equiv) in one portion. The reaction mixture was stirred at rt for 4 h, and then the reaction was quenched with the addition of brine (15 mL) and diluted with EtOAc (30 mL). The combined organic layers were washed with brine (3 × 10 mL), dried over Na<sub>2</sub>SO<sub>4</sub>, filtered and concentrated under reduced pressure. The resulting residue was purified by flash column chromatography with gradient eluents (petroleum ether / ethyl acetate = 3/1) to provide compound **3d-I**.

### 2. General procedure for the synthesis of 3d-II

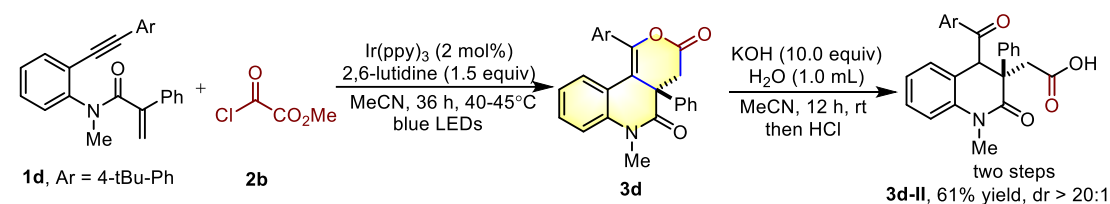

All optimization reactions were set up in a glove box under N<sub>2</sub> atmosphere. Substrate **1d** (0.2 mmol, 1.0 equiv), methyl chlorooxoacetate **2b** (0.6 mmol, 3.0 equiv) and 2,6-

lutidine (0.3 mmol, 1.5 equiv) were added to a solution of photocatalyst Ir(ppy)<sub>3</sub> (2 mol %) in dry MeCN (4 mL) at room temperature. The heterogenous mixture was placed in the irradiation apparatus equipped with blue LEDs. The resulting mixture was stirred for 36 h. Upon completion of the reaction, KOH (2.0 mmol, 10.0 equiv) and H<sub>2</sub>O (1 mL) were added. The reaction mixture was stirred at rt for 12 h, and then the reaction was quenched with 6 M HCl (2.0 mL) and diluted with EtOAc (30 mL). The combined organic layers were washed with brine (3 × 10 mL), dried over Na<sub>2</sub>SO<sub>4</sub>, filtered and concentrated under reduced pressure. The resulting residue was purified by flash column chromatography with gradient eluents (petroleum ether / ethyl acetate = 1/1) to provide compound **3d-II**.

### 3. General procedure for the synthesis of 3d-III

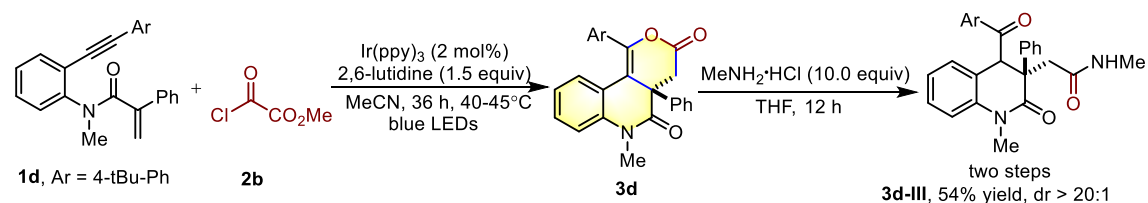

All optimization reactions were set up in a glove box under N<sub>2</sub> atmosphere. Substrate **1d** (0.2 mmol, 1.0 equiv), methyl chlorooxoacetate **2b** (0.6 mmol, 3.0 equiv) and 2,6-lutidine (0.3 mmol, 1.5 equiv) were added to a solution of photocatalyst Ir(ppy)<sub>3</sub> (2 mol %) in dry MeCN (4 mL) at room temperature. The heterogenous mixture was placed in the irradiation apparatus equipped with blue LEDs. The resulting mixture was stirred for 36 h. Upon completion of the reaction, the mixture was diluted with methyl acetate (30 mL), washed with brine (10 x 3 mL), dried with Na<sub>2</sub>SO<sub>4</sub>. After evaporation of the solvent, the crude product was used in the following step without further purification. To a solution of crude product in THF (4.0 mL) was added methylamine hydrochloride (2.0 mmol, 10.0 equiv) in one portion. The reaction mixture was stirred at rt for 12 h, and then the reaction was quenched with the addition of brine (15 mL) and diluted with EtOAc (30 mL). The combined organic layers were washed with brine (3 × 10 mL), dried over Na<sub>2</sub>SO<sub>4</sub>, filtered and concentrated under reduced pressure. The resulting residue was purified by flash column chromatography with gradient eluents (petroleum ether / ethyl acetate = 3/2) to provide compound **3d-III**.

#### 4. General procedure for the synthesis of 3d-IV

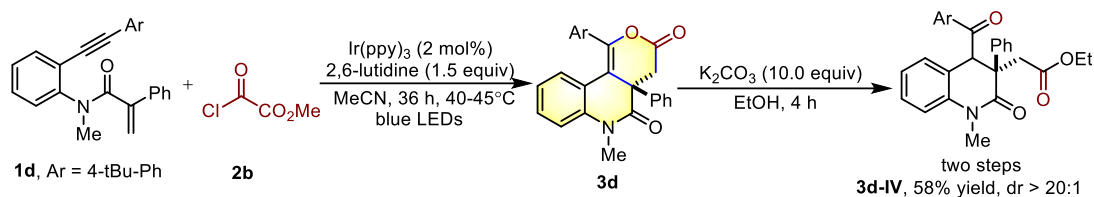

All optimization reactions were set up in a glove box under N<sub>2</sub> atmosphere. Substrate **1d** (0.2 mmol, 1.0 equiv), methyl chlorooxoacetate **2b** (0.6 mmol, 3.0 equiv) and 2,6-lutidine (0.3 mmol, 1.5 equiv) were added to a solution of photocatalyst Ir(ppy)<sub>3</sub> (2 mol %) in dry MeCN (4 mL) at room temperature. The heterogenous mixture was placed in the irradiation apparatus equipped with blue LEDs. The resulting mixture was stirred for 36 h. Upon completion of the reaction, the mixture was diluted with methyl acetate (30 mL), washed with brine (10 x 3 mL), dried with Na<sub>2</sub>SO<sub>4</sub>. After evaporation of the solvent, the crude product was used in the following step without further purification. To a solution of crude product in EtOH (4.0 mL) was added K<sub>2</sub>CO<sub>3</sub> (2.0 mmol, 10.0 equiv) in one portion. The reaction mixture was stirred at rt for 4 h, and then the reaction was quenched with the addition of brine (15 mL) and diluted with EtOAc (30 mL). The combined organic layers were washed with brine (3 × 10 mL), dried over Na<sub>2</sub>SO<sub>4</sub>, filtered and concentrated under reduced pressure. The resulting residue was purified by flash column chromatography with gradient eluents (petroleum ether / ethyl acetate = 4/1) to provide compound **3d-IV**.

#### 5. Devices for the photocatalytic reactions

Irradiation of visible light was performed with a 36 W Blue LED strip. All photocatalyzed alkoxyacylation/cyclization reactions were carried out at room temperature (r.t.) with fan-assisted cooling to maintain a temperature of approximately 40-45 °C. The distance between tube and lamp was approximately 3 cm.

Manufacture of the light source: LED strip

Manufacturer: Greethink

Model: GT-5050-Blue



Wavelength of peak intensity: 460-470 nm

Material of the irradiation vessel: borosilicate glass

Distance of the irradiation vessel from the light source: approximately 3 cm.

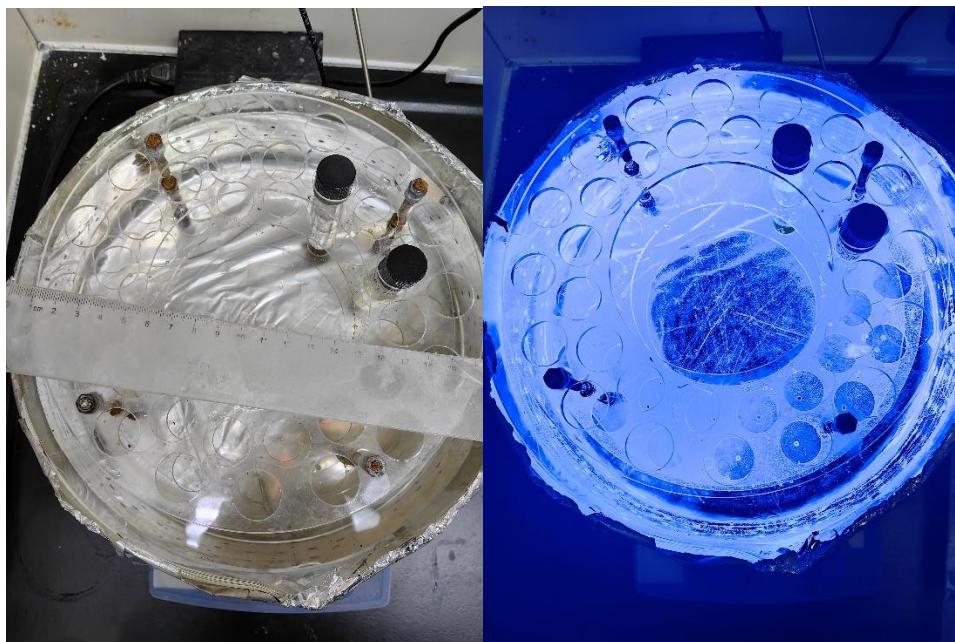

Figure S1. The reaction set-up for the photocatalytic reactions

## 6. Mechanistic study

a) Mechanistic study

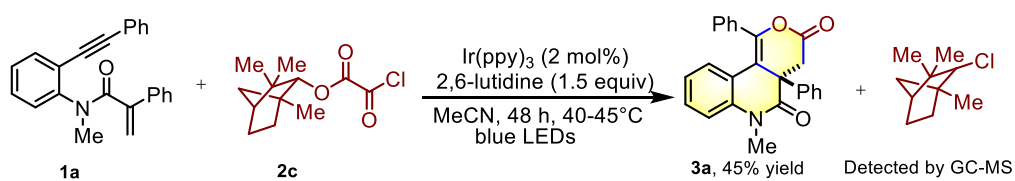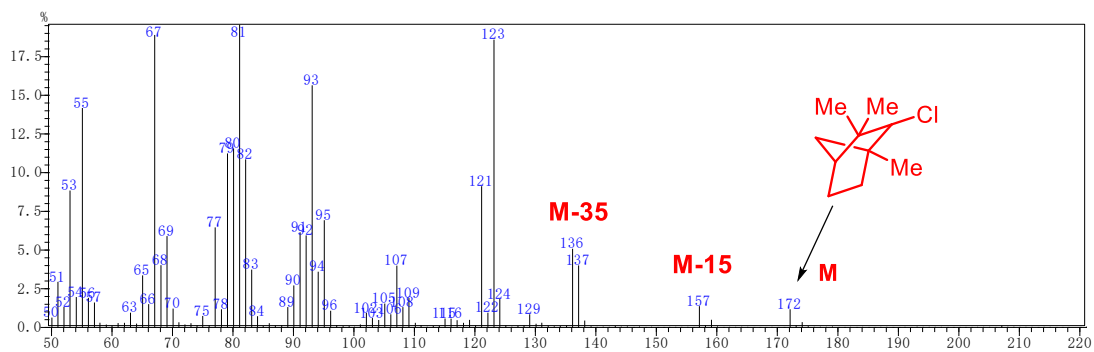

## 7. X-ray data for compound 3e (CCDC 2203307)

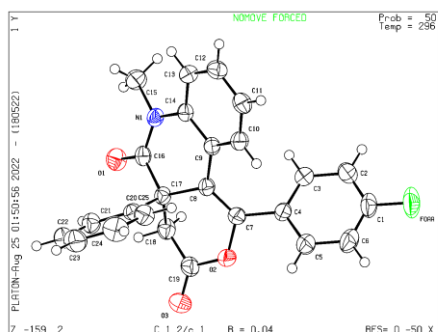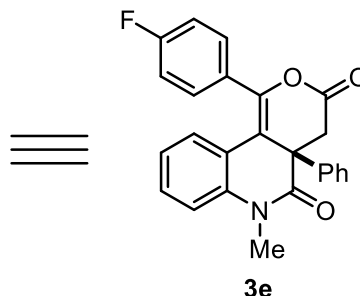

Bond precision: C-C = 0.0022 Å Wavelength=0.71073

Cell: a=23.665(3) b=9.9238(11) c=18.980(2)  
 alpha=90 beta=117.870(2) gamma=90

Temperature: 296 K

|                        | Calculated                                         | Reported                                           |
|------------------------|----------------------------------------------------|----------------------------------------------------|
| Volume                 | 3940.4(8)                                          | 3940.4(8)                                          |
| Space group            | C 2/c                                              | C 1 2/c 1                                          |
| Hall group             | -C 2yc                                             | -C 2yc                                             |
| Moiety formula         | C <sub>25</sub> H <sub>18</sub> F N O <sub>3</sub> | C <sub>25</sub> H <sub>18</sub> F N O <sub>3</sub> |
| Sum formula            | C <sub>25</sub> H <sub>18</sub> F N O <sub>3</sub> | C <sub>25</sub> H <sub>18</sub> F N O <sub>3</sub> |
| Mr                     | 399.40                                             | 399.40                                             |
| Dx, g cm <sup>-3</sup> | 1.347                                              | 1.347                                              |
| Z                      | 8                                                  | 8                                                  |
| Mu (mm <sup>-1</sup> ) | 0.095                                              | 0.095                                              |
| F000                   | 1664.0                                             | 1664.0                                             |
| F000'                  | 1664.87                                            |                                                    |
| h,k,lmax               | 28,11,22                                           | 28,11,22                                           |
| Nref                   | 3472                                               | 3462                                               |
| Tmin,Tmax              | 0.976,0.979                                        |                                                    |
| Tmin'                  | 0.976                                              |                                                    |
| Correction method=     | Not given                                          |                                                    |
| Data completeness=     | 0.997                                              | Theta(max)= 24.997                                 |
| R(reflections)=        | 0.0378( 2768)                                      | wR2(reflections)=<br>0.1155( 3462)                 |
| S =                    | 1.041                                              | Npar = 272                                         |

## 8. Characterization of new substrates and all products

### 6-methyl-1,4a-diphenyl-4,4a-dihydro-3H-pyrano[4,3-c]quinoline-3,5(6H)-dione (3a)

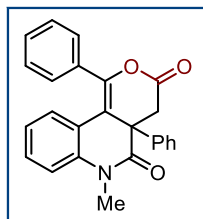

Purification by flash chromatography (DCM). Colorless oil; 64% yield;  $^1\text{H NMR}$  (400 MHz,  $\text{CDCl}_3$ )  $\delta$  (ppm) 7.62–7.59 (m, 2H), 7.44–7.35 (m, 3H), 7.31 (d,  $J = 7.1$  Hz, 1H), 7.26–7.17 (m, 3H), 7.10 (td,  $J = 7.8, 1.3$  Hz, 1H), 6.96 (dd,  $J = 7.8, 1.0$  Hz, 1H), 6.89 (d,  $J = 8.0$  Hz, 1H), 6.71 (td,  $J = 7.6, 0.7$  Hz, 1H), 3.49–3.44 (m, 4H), 3.33 (d,  $J = 15.8$  Hz, 1H);  $^{13}\text{C NMR}$  (100 MHz,  $\text{CDCl}_3$ )  $\delta$  (ppm) 168.3, 166.2, 148.9, 138.5, 137.3, 132.6, 130.1, 129.9, 129.7, 129.2, 128.7, 128.6, 128.2, 126.1, 123.0, 120.6, 115.4, 110.4, 50.4, 40.2, 30.8; HRMS (ESI) for  $\text{C}_{25}\text{H}_{20}\text{NO}_3$   $[\text{M}+\text{H}]^+$  calcd. 382.1438, found 382.1440.

### 6-methyl-4a-phenyl-1-(p-tolyl)-4,4a-dihydro-3H-pyrano[4,3-c]quinoline-3,5(6H)-dione (3b)

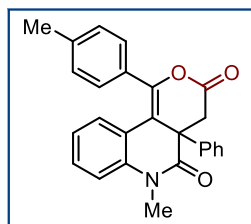

Purification by flash chromatography (DCM). Colorless oil; 52% yield;  $^1\text{H NMR}$  (400 MHz,  $\text{CDCl}_3$ )  $\delta$  (ppm) 7.49 (d,  $J = 8.0$  Hz, 2H), 7.30 (d,  $J = 7.4$  Hz, 2H), 7.25–7.15 (m, 5H), 7.10 (t,  $J = 7.8$  Hz, 1H), 7.01 (d,  $J = 8.0$  Hz, 1H), 6.88 (d,  $J = 8.2$  Hz, 1H), 6.73 (t,  $J = 7.5$  Hz, 1H), 3.47–3.42 (m, 4H), 3.32 (d,  $J = 15.8$  Hz, 1H);  $^{13}\text{C NMR}$  (100 MHz,  $\text{CDCl}_3$ )  $\delta$  (ppm) 168.3, 166.4, 149.0, 140.4, 138.4, 137.3, 129.8, 129.6, 129.6, 129.3, 129.2, 128.6, 128.2, 126.1, 123.0, 120.9, 115.3, 109.7, 50.4, 40.2, 30.8, 21.5; HRMS (ESI) for  $\text{C}_{26}\text{H}_{22}\text{NO}_3$   $[\text{M}+\text{H}]^+$  calcd. 396.1594, found 396.1605.

### 1-([1,1'-biphenyl]-4-yl)-6-methyl-4a-phenyl-4,4a-dihydro-3H-pyrano[4,3-c]quinoline-3,5(6H)-dione (3c)

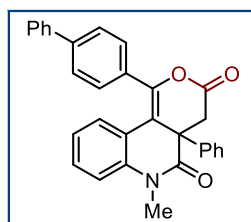

Purification by flash chromatography (DCM). White solid; mp 241–243°C; 53% yield;  $^1\text{H NMR}$  (400 MHz,  $\text{CDCl}_3$ )  $\delta$  (ppm) 7.68 (d,  $J = 8.1$  Hz, 2H), 7.65–7.59 (m, 4H), 7.47 (t,  $J = 7.5$  Hz, 2H), 7.40 (d,  $J = 7.2$  Hz, 1H), 7.33 (d,  $J = 7.6$  Hz, 2H), 7.27–7.19 (m, 3H), 7.10 (t,  $J = 7.9$  Hz, 2H), 6.91 (d,  $J = 8.1$  Hz, 1H), 6.75 (t,  $J = 7.6$  Hz, 1H),

3.49–3.45 (m, 4H), 3.35 (d,  $J = 15.9$  Hz, 1H);  $^{13}\text{C}$  NMR (100 MHz,  $\text{CDCl}_3$ )  $\delta$  (ppm) 168.3, 166.2, 148.5, 142.7, 139.9, 138.5, 137.3, 131.4, 130.2, 129.9, 129.2, 128.9, 128.8, 128.3, 127.9, 127.1, 127.0, 126.1, 123.1, 120.7, 115.4, 110.5, 50.5, 40.2, 30.8; HRMS (ESI) for  $\text{C}_{31}\text{H}_{24}\text{NO}_3$   $[\text{M}+\text{H}]^+$  calcd. 458.1751, found 458.1762.

*1-(4-(tert-butyl)phenyl)-6-methyl-4a-phenyl-4,4a-dihydro-3H-pyranof[4,3-c]quinoline-3,5(6H)-dione (3d)*

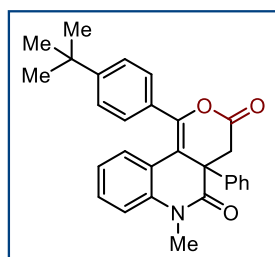

Purification by flash chromatography (DCM). Colorless oil; 65% yield;  $^1\text{H}$  NMR (400 MHz,  $\text{CDCl}_3$ )  $\delta$  (ppm) 7.53 (d,  $J = 8.3$  Hz, 2H), 7.37 (d,  $J = 8.4$  Hz, 2H), 7.31 (d,  $J = 7.5$  Hz, 2H), 7.23–7.16 (m, 3H), 7.09–7.03 (m, 2H), 6.87 (d,  $J = 8.2$  Hz, 1H), 6.73 (t,  $J = 7.6$  Hz, 1H), 3.47–3.42 (m, 4H), 3.31 (d,  $J = 15.8$  Hz, 1H), 1.33 (s, 9H);  $^{13}\text{C}$  NMR (100 MHz,  $\text{CDCl}_3$ )  $\delta$  (ppm) 168.3, 166.3, 153.5, 148.9, 138.4, 137.3, 129.8, 129.6, 129.4, 129.1, 128.6, 128.2, 126.1, 125.5, 123.0, 120.8, 115.3, 109.8, 50.4, 40.2, 34.8, 31.1, 30.7; HRMS (ESI) for  $\text{C}_{29}\text{H}_{28}\text{NO}_3$   $[\text{M}+\text{H}]^+$  calcd. 438.2064, found 438.2075.

*1-(4-fluorophenyl)-6-methyl-4a-phenyl-4,4a-dihydro-3H-pyranof[4,3-c]quinoline-3,5(6H)-dione (3e)*

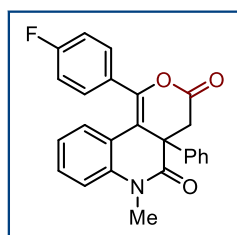

Purification by flash chromatography (DCM). White solid; mp 218–220°C; 59% yield;  $^1\text{H}$  NMR (400 MHz,  $\text{CDCl}_3$ )  $\delta$  (ppm) 7.62–7.57 (m, 2H), 7.29 (d,  $J = 7.4$  Hz, 2H), 7.26–7.18 (m, 3H), 7.14–7.04 (m, 3H), 6.96 (d,  $J = 7.3$  Hz, 1H), 6.90 (d,  $J = 8.2$  Hz, 1H), 6.75 (t,  $J = 7.5$  Hz, 1H), 3.48–3.43 (m, 4H), 3.33 (d,  $J = 15.8$  Hz, 1H);  $^{13}\text{C}$  NMR (100 MHz,  $\text{CDCl}_3$ )  $\delta$  (ppm) 168.2, 166.2, 163.5 (d,  $J = 249.7$  Hz), 147.8, 138.6, 137.2, 131.8 (d,  $J = 8.3$  Hz), 129.7, 129.2, 128.9, 128.7 (d,  $J = 3.4$  Hz), 128.3, 126.1, 123.1, 120.4, 115.8 (d,  $J = 21.8$  Hz), 115.5, 110.5, 50.4, 40.2, 30.8; HRMS (ESI) for  $\text{C}_{25}\text{H}_{19}\text{FNO}_3$   $[\text{M}+\text{H}]^+$  calcd. 400.1343, found 400.1350.

*1-(4-chlorophenyl)-6-methyl-4a-phenyl-4,4a-dihydro-3H-pyranof[4,3-c]quinoline-3,5(6H)-*

*dione (3f)*

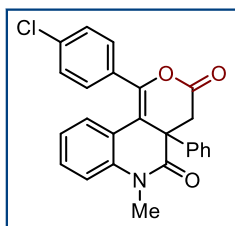

Purification by flash chromatography (DCM). White solid; mp 174-176°C; 30% yield;  $^1\text{H NMR}$  (400 MHz,  $\text{CDCl}_3$ )  $\delta$  (ppm) 7.55 (d,  $J = 8.5$  Hz, 2H), 7.34 (d,  $J = 8.5$  Hz, 2H), 7.30–7.19 (m, 5H), 7.15–7.10 (m, 1H), 6.97 (d,  $J = 7.7$  Hz, 1H), 6.90 (d,  $J = 8.2$  Hz, 1H), 6.76 (t,  $J = 7.4$  Hz, 1H), 3.48–3.43 (m, 4H), 3.32 (d,  $J = 15.8$  Hz, 1H);  $^{13}\text{C NMR}$  (100 MHz,  $\text{CDCl}_3$ )  $\delta$  (ppm) 168.2, 166.0, 147.6, 138.6, 137.1, 136.1, 131.1, 129.8, 129.2, 129.1, 128.9, 128.3, 126.1, 123.2, 120.3, 115.5, 111.1, 50.5, 40.2, 30.8; HRMS (ESI) for  $\text{C}_{25}\text{H}_{19}\text{ClNO}_3$   $[\text{M}+\text{H}]^+$  calcd. 416.1048, found 416.1057.

*9-chloro-6-methyl-1,4a-diphenyl-4,4a-dihydro-3H-pyranof[4,3-c]quinoline-3,5(6H)-dione*

*(3g)*

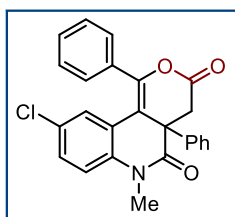

Purification by flash chromatography (DCM). Colorless oil; 55% yield;  $^1\text{H NMR}$  (400 MHz,  $\text{CDCl}_3$ )  $\delta$  (ppm) 7.59 (d,  $J = 7.2$  Hz, 2H), 7.50–7.39 (m, 3H), 7.29–7.21 (m, 5H), 7.06 (dd,  $J = 8.8, 2.2$  Hz, 1H), 6.86 (d,  $J = 2.2$  Hz, 1H), 6.82 (d,  $J = 8.8$  Hz, 1H), 3.48–3.43 (m, 4H), 3.33 (d,  $J = 15.9$  Hz, 1H);  $^{13}\text{C NMR}$  (100 MHz,  $\text{CDCl}_3$ )  $\delta$  (ppm) 168.0, 165.8, 150.1, 137.1, 136.9, 131.9, 130.6, 129.6, 129.4, 129.3, 128.8, 128.5, 128.5, 128.3, 126.0, 122.3, 116.6, 109.2, 50.2, 40.1, 30.9; HRMS (ESI) for  $\text{C}_{25}\text{H}_{19}\text{ClNO}_3$   $[\text{M}+\text{H}]^+$  calcd. 416.1048, found 416.1057.

*9-bromo-6-methyl-1,4a-diphenyl-4,4a-dihydro-3H-pyranof[4,3-c]quinoline-3,5(6H)-dione*

*(3h)*

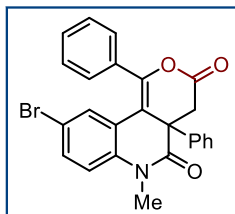

Purification by flash chromatography (DCM). Colorless oil; 51% yield;  $^1\text{H NMR}$  (400 MHz,  $\text{CDCl}_3$ )  $\delta$  (ppm) 7.59 (d,  $J = 7.1$  Hz, 2H), 7.50–7.40 (m, 3H), 7.29–7.21 (m, 5H), 7.20 (dd,  $J = 8.8, 2.2$  Hz, 1H), 7.00 (d,  $J = 2.2$  Hz, 1H), 6.76 (d,  $J = 8.8$  Hz, 1H), 3.48–3.43 (m, 4H), 3.32 (d,  $J = 15.9$  Hz, 1H);  $^{13}\text{C NMR}$  (100 MHz,  $\text{CDCl}_3$ )  $\delta$  (ppm) 168.0, 165.8, 150.1, 137.6, 136.9, 132.2, 131.9, 131.4, 130.6, 129.6, 129.4, 128.8, 128.5, 126.0, 122.6, 116.9, 115.7, 109.1, 50.2, 40.1, 30.9; HRMS (ESI) for  $\text{C}_{25}\text{H}_{19}\text{BrNO}_3$

$[M+H]^+$  calcd. 460.0543, found 460.0548.

**6-methyl-3,5-dioxo-1,4a-diphenyl-4,4a,5,6-tetrahydro-3H-pyrano[4,3-c]quinoline-9-carbonitrile (3i)**

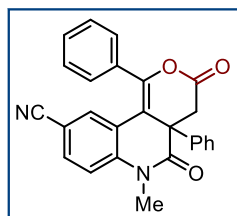

Purification by flash chromatography (DCM). White solid; mp 195-197°C; 57% yield;  $^1\text{H NMR}$  (400 MHz,  $\text{CDCl}_3$ )  $\delta$  (ppm) 7.56 (d,  $J = 7.5$  Hz, 2H), 7.50 (t,  $J = 7.3$  Hz, 1H), 7.44–7.35 (m, 3H), 7.30–7.21 (m, 5H), 7.19 (s, 1H), 6.97 (d,  $J = 8.6$  Hz, 1H), 3.49 (s, 3H), 3.44 (d,  $J = 15.8$  Hz, 1H), 3.35 (d,  $J = 15.8$  Hz, 1H);  $^{13}\text{C NMR}$  (100 MHz,  $\text{CDCl}_3$ )  $\delta$  (ppm) 168.3, 165.2, 151.0, 141.8, 136.4, 133.4, 132.2, 131.4, 131.1, 129.6, 129.5, 129.1, 128.7, 125.8, 121.9, 118.0, 116.0, 107.9, 106.4, 50.2, 40.0, 30.9; HRMS (ESI) for  $\text{C}_{26}\text{H}_{19}\text{N}_2\text{O}_3$   $[M+H]^+$  calcd. 407.1390, found 407.1400.

**4a,6-dimethyl-1-phenyl-4,4a-dihydro-3H-pyrano[4,3-c]quinoline-3,5(6H)-dione (3j)**

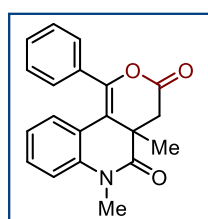

Purification by flash chromatography (petroleum ether/ethyl acetate = 6/1). White solid; mp 103-105°C; 60% yield;  $^1\text{H NMR}$  (400 MHz,  $\text{CDCl}_3$ )  $\delta$  (ppm) 7.49 (d,  $J = 7.0$  Hz, 2H), 7.38–7.30 (m, 3H), 7.22 (td,  $J = 7.8, 1.1$  Hz, 1H), 7.04 (d,  $J = 8.2$  Hz, 1H), 6.87 (dd,  $J = 7.8, 0.9$  Hz, 1H), 6.75 (t,  $J = 7.4$  Hz, 1H), 3.45 (s, 3H), 3.23 (d,  $J = 15.9$  Hz, 1H), 2.98 (d,  $J = 15.9$  Hz, 1H), 1.29 (s, 3H);  $^{13}\text{C NMR}$  (100 MHz,  $\text{CDCl}_3$ )  $\delta$  (ppm) 170.6, 167.1, 146.5, 138.6, 132.8, 130.0, 129.8, 129.6, 128.9, 128.5, 122.9, 119.6, 115.1, 112.5, 42.1, 37.4, 30.4, 23.1; HRMS (ESI) for  $\text{C}_{20}\text{H}_{17}\text{NO}_3\text{Na}$   $[M+\text{Na}]^+$  calcd. 342.1101, found 342.1110.

**4a,6-dimethyl-1-(p-tolyl)-4,4a-dihydro-3H-pyrano[4,3-c]quinoline-3,5(6H)-dione (3k)**

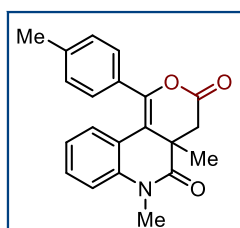

Purification by flash chromatography (petroleum ether/ethyl acetate = 6/1). Colorless oil; 57% yield;  $^1\text{H NMR}$  (400 MHz,  $\text{CDCl}_3$ )  $\delta$  (ppm) 7.37 (d,  $J = 8.1$  Hz, 2H), 7.24–7.19 (m, 1H), 7.12 (d,  $J = 8.1$  Hz, 2H), 7.03 (d,  $J = 8.2$  Hz, 1H), 6.92 (dd,  $J = 7.8, 1.2$  Hz, 1H), 6.76 (t,  $J = 7.4$  Hz, 1H), 3.44 (s, 3H), 3.21 (d,  $J = 15.9$  Hz, 1H), 2.96 (d,  $J = 15.9$  Hz, 1H), 2.37 (s, 3H), 1.27 (s, 3H);  $^{13}\text{C NMR}$  (100 MHz,  $\text{CDCl}_3$ )  $\delta$  (ppm) 170.7,

167.2, 146.6, 140.1, 138.6, 130.0, 129.8, 129.5, 129.2, 128.7, 122.9, 119.9, 115.1, 111.9, 42.1, 37.4, 30.4, 23.1, 21.4; HRMS (ESI) for C<sub>21</sub>H<sub>19</sub>NO<sub>3</sub>Na [M+Na]<sup>+</sup> calcd. 356.1257, found 356.1266.

*4a,6-dimethyl-1-(m-tolyl)-4,4a-dihydro-3H-pyrano[4,3-c]quinoline-3,5(6H)-dione*  
(3l)

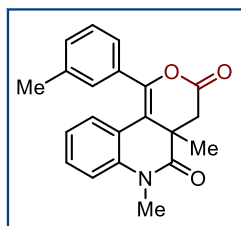

Purification by flash chromatography (petroleum ether/ethyl acetate = 6/1). Colorless oil; 57% yield; <sup>1</sup>H NMR (400 MHz, CDCl<sub>3</sub>) δ (ppm) 7.35 (s, 1H), 7.25–7.17 (m, 4H), 7.03 (d, *J* = 8.2 Hz, 1H), 6.89 (dd, *J* = 8.0, 1.3 Hz, 1H), 6.75 (t, *J* = 7.4 Hz, 1H), 3.44 (s, 3H), 3.22 (d, *J* = 15.9 Hz, 1H), 2.97 (d, *J* = 15.9 Hz, 1H), 2.32 (s, 3H), 1.28 (s, 3H); <sup>13</sup>C NMR (100 MHz, CDCl<sub>3</sub>) δ (ppm) 170.7, 167.1, 146.7, 138.5, 138.4, 132.7, 130.6, 130.0, 130.0, 128.8, 128.3, 126.9, 122.8, 119.7, 115.0, 112.3, 42.1, 37.4, 30.4, 23.1, 21.3; HRMS (ESI) for C<sub>21</sub>H<sub>19</sub>NO<sub>3</sub>Na [M+Na]<sup>+</sup> calcd. 356.1257, found 356.1264.

*1-(3,5-dimethoxyphenyl)-4a,6-dimethyl-4,4a-dihydro-3H-pyrano[4,3-c]quinoline-3,5(6H)-dione*  
(3m)

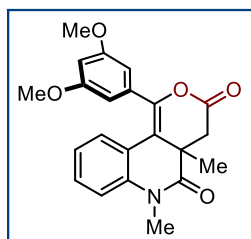

Purification by flash chromatography (petroleum ether/ethyl acetate = 6/1). Colorless oil; 53% yield; <sup>1</sup>H NMR (400 MHz, CDCl<sub>3</sub>) δ (ppm) 7.24–7.19 (m, 1H), 7.02 (d, *J* = 8.1 Hz, 1H), 6.95 (dd, *J* = 7.8, 1.2 Hz, 1H), 6.79 (t, *J* = 7.6 Hz, 1H), 6.61 (d, *J* = 2.2 Hz, 2H), 6.47 (t, *J* = 2.2 Hz, 1H), 3.71 (s, 6H), 3.44 (s, 3H), 3.22 (d, *J* = 15.9 Hz, 1H), 2.97 (d, *J* = 15.9 Hz, 1H), 1.28 (s, 3H); <sup>13</sup>C NMR (100 MHz, CDCl<sub>3</sub>) δ (ppm) 170.6, 167.0, 160.7, 146.2, 138.5, 134.5, 130.1, 129.0, 122.9, 119.4, 115.0, 112.9, 107.5, 102.5, 55.5, 42.1, 37.4, 30.4, 23.1; HRMS (ESI) for C<sub>22</sub>H<sub>21</sub>NO<sub>5</sub>Na [M+Na]<sup>+</sup> calcd. 402.1312, found 402.1320.

*4a,6-dimethyl-1-phenyl-9-(trifluoromethyl)-4,4a-dihydro-3H-pyrano[4,3-c]quinoline-3,5(6H)-dione*  
(3n)

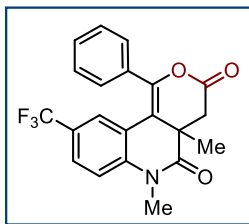

Purification by flash chromatography (petroleum ether/ethyl acetate = 4/1). White solid; mp 115-117°C; 66% yield;  $^1\text{H NMR}$  (400 MHz,  $\text{CDCl}_3$ )  $\delta$  (ppm) 7.46–7.40 (m, 4H), 7.37–7.33 (m, 2H), 7.11 (d,  $J = 8.6$  Hz, 1H), 7.05 (d,  $J = 1.3$  Hz, 1H), 3.47 (s, 3H), 3.25 (d,  $J = 16.0$  Hz, 1H), 3.01 (d,  $J = 16.0$  Hz, 1H), 1.31 (s, 3H);  $^{13}\text{C NMR}$  (100 MHz,  $\text{CDCl}_3$ )  $\delta$  (ppm) 170.7, 166.4, 148.2, 141.1, 131.9, 130.5, 129.4, 128.8, 127.2 (q,  $J = 3.8$  Hz), 125.5 (q,  $J = 3.7$  Hz), 125.0 (q,  $J = 33.0$  Hz), 123.4 (q,  $J = 270.2$  Hz), 120.0, 115.1, 111.0, 41.9, 37.3, 30.6, 23.3; HRMS (ESI) for  $\text{C}_{21}\text{H}_{16}\text{F}_3\text{NO}_3\text{Na}$   $[\text{M}+\text{Na}]^+$  calcd. 410.0974, found 410.0979.

**9-fluoro-4a,6-dimethyl-1-phenyl-4,4a-dihydro-3H-pyrano[4,3-c]quinoline-3,5(6H)-dione (3o)**

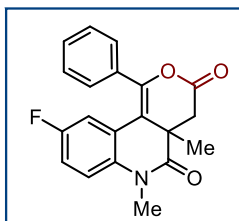

Purification by flash chromatography (petroleum ether/ethyl acetate = 4/1). White solid; mp 158-160°C; 55% yield;  $^1\text{H NMR}$  (400 MHz,  $\text{CDCl}_3$ )  $\delta$  (ppm) 7.50 (d,  $J = 7.1$  Hz, 2H), 7.46–7.36 (m, 3H), 7.02–6.91 (m, 2H), 6.55 (dd,  $J = 9.7, 2.7$  Hz, 1H), 3.45 (s, 3H), 3.24 (d,  $J = 16.0$  Hz, 1H), 3.00 (d,  $J = 16.0$  Hz, 1H), 1.31 (s, 3H);  $^{13}\text{C NMR}$  (100 MHz,  $\text{CDCl}_3$ )  $\delta$  (ppm) 170.3, 166.6, 158.2 (d,  $J = 241.1$  Hz), 147.7, 135.0 (d,  $J = 2.4$  Hz), 132.2, 130.4, 129.6, 128.8, 121.5 (d,  $J = 8.3$  Hz), 116.4 (d,  $J = 12.4$  Hz), 116.3 (d,  $J = 3.9$  Hz), 115.6 (d,  $J = 22.8$  Hz), 111.7 (d,  $J = 2.1$  Hz), 41.9, 37.3, 30.7, 23.1; HRMS (ESI) for  $\text{C}_{20}\text{H}_{16}\text{FNO}_3\text{Na}$   $[\text{M}+\text{Na}]^+$  calcd. 360.1006, found 360.1013.

**6-ethyl-4a-methyl-1-phenyl-4,4a-dihydro-3H-pyrano[4,3-c]quinoline-3,5(6H)-dione (3p)**

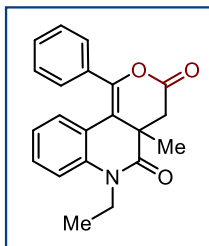

Purification by flash chromatography (petroleum ether/ethyl acetate = 6/1). White solid; mp 142-144°C; 57% yield;  $^1\text{H NMR}$  (400 MHz,  $\text{CDCl}_3$ )  $\delta$  (ppm) 7.49–7.46 (m, 2H), 7.39–7.29 (m, 3H), 7.20 (td,  $J = 7.8, 1.5$  Hz, 1H), 7.05 (d,  $J = 8.2$  Hz, 1H), 6.88 (dd,  $J = 7.9, 1.4$  Hz, 1H), 6.73 (td,  $J = 7.6, 0.8$  Hz, 1H), 4.23–4.13 (m, 1H), 3.96–3.86 (m, 1H), 3.19 (d,  $J = 16.0$  Hz, 1H), 3.01 (d,  $J = 16.0$  Hz, 1H), 1.32 (t,  $J = 7.1$  Hz, 3H), 1.28 (s, 3H);  $^{13}\text{C NMR}$  (100 MHz,  $\text{CDCl}_3$ )  $\delta$  (ppm) 170.1, 167.2, 146.3, 137.6, 132.9, 130.4, 129.8, 129.7, 128.9, 128.5, 122.7, 119.8, 114.9, 112.5, 42.0, 38.4, 37.3, 23.0,



12.5; HRMS (ESI) for C<sub>21</sub>H<sub>19</sub>NO<sub>3</sub>Na [M+Na]<sup>+</sup> calcd. 356.1257, found 356.1267.

**6-benzyl-4a-methyl-1-phenyl-4,4a-dihydro-3H-pyrano[4,3-c]quinoline-3,5(6H)-dione (3q)**

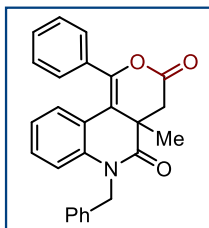

Purification by flash chromatography (petroleum ether/ethyl acetate = 6/1). Colorless oil; 53% yield; <sup>1</sup>H NMR (400 MHz, CDCl<sub>3</sub>) δ (ppm) 7.50 (d, *J* = 7.0 Hz, 2H), 7.40–7.28 (m, 6H), 7.22 (d, *J* = 7.4 Hz, 2H), 7.06 (td, *J* = 7.8, 0.9 Hz, 1H), 6.93–6.87 (m, 2H), 6.70 (t, *J* = 7.6 Hz, 1H), 5.54 (d, *J* = 16.2 Hz, 1H), 4.91 (d, *J* = 16.2 Hz, 1H), 3.25 (d, *J* = 16.0 Hz, 1H), 3.09 (d, *J* = 16.0 Hz, 1H), 1.42 (s, 3H); <sup>13</sup>C NMR (100 MHz, CDCl<sub>3</sub>) δ (ppm) 170.9, 167.0, 146.6, 138.0, 136.4, 132.8, 130.1, 129.9, 129.7, 128.9, 128.9, 128.6, 127.3, 126.0, 123.0, 119.8, 116.0, 112.2, 47.0, 42.3, 37.4, 23.3; HRMS (ESI) for C<sub>26</sub>H<sub>21</sub>NO<sub>3</sub>Na [M+Na]<sup>+</sup> calcd. 418.1414, found 418.1422.

**6-allyl-4a-methyl-1-phenyl-4,4a-dihydro-3H-pyrano[4,3-c]quinoline-3,5(6H)-dione (3r)**

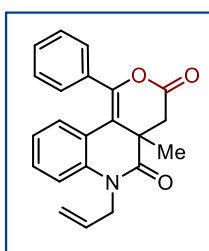

Purification by flash chromatography (petroleum ether/ethyl acetate = 6/1). Colorless oil; 48% yield; <sup>1</sup>H NMR (400 MHz, CDCl<sub>3</sub>) δ (ppm) 7.51–7.48 (m, 2H), 7.40–7.30 (m, 3H), 7.17 (td, *J* = 7.8, 1.4 Hz, 1H), 7.05 (d, *J* = 8.2 Hz, 1H), 6.88 (dd, *J* = 7.8, 1.2 Hz, 1H), 6.73 (td, *J* = 7.6, 0.8 Hz, 1H), 5.99–5.89 (m, 1H), 5.27–5.23 (m, 1H), 5.16 (d, *J* = 17.8 Hz, 1H), 4.93–4.87 (m, 1H), 4.35–4.29 (m, 1H), 3.21 (d, *J* = 16.0 Hz, 1H), 3.02 (d, *J* = 16.0 Hz, 1H), 1.33 (s, 3H); <sup>13</sup>C NMR (100 MHz, CDCl<sub>3</sub>) δ (ppm) 170.4, 167.1, 146.5, 137.9, 132.8, 131.8, 130.1, 129.9, 129.7, 128.8, 128.6, 122.9, 119.7, 116.5, 115.8, 112.3, 45.8, 42.2, 37.3, 23.2; HRMS (ESI) for C<sub>22</sub>H<sub>19</sub>NO<sub>3</sub>Na [M+Na]<sup>+</sup> calcd. 368.1257, found 368.1270.

**4a-methyl-1-phenyl-6-(prop-2-yn-1-yl)-4,4a-dihydro-3H-pyrano[4,3-c]quinoline-3,5(6H)-dione (3s)**

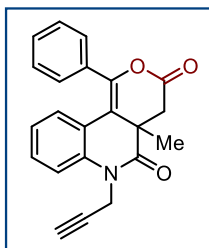

Purification by flash chromatography (petroleum ether/ethyl acetate = 6/1). White solid; mp 156-158°C; 62% yield;  $^1\text{H NMR}$  (400 MHz,  $\text{CDCl}_3$ )  $\delta$  (ppm) 7.50–7.47 (m, 2H), 7.39–7.30 (m, 3H), 7.25 (d,  $J = 3.8$  Hz, 2H), 6.89 (d,  $J = 7.8$  Hz, 2H), 6.80–6.75 (m, 1H), 5.00–4.94 (m, 1H), 4.58–4.52 (m, 1H), 3.22 (d,  $J = 16.0$  Hz, 1H), 3.01 (d,  $J = 16.0$  Hz, 1H), 2.29 (t,  $J = 2.4$  Hz, 1H), 1.31 (s, 3H);  $^{13}\text{C NMR}$  (100 MHz,  $\text{CDCl}_3$ )  $\delta$  (ppm) 170.1, 166.8, 146.8, 137.0, 132.7, 130.2, 129.9, 129.6, 128.9, 128.6, 127.9, 123.3, 119.8, 115.5, 112.0, 78.0, 72.4, 42.2, 37.2, 32.8, 22.9; HRMS (ESI) for  $\text{C}_{22}\text{H}_{17}\text{NO}_3\text{Na}$   $[\text{M}+\text{Na}]^+$  calcd. 366.1101, found 366.1111.

*9b-(4-(tert-butyl)benzoyl)-5-methyl-3a-phenyl-3,3a,5,9b-tetrahydrofuro[3,2-c]quinoline-2,4-dione (3d-I)*

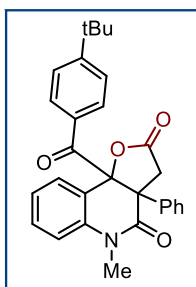

Purification by flash chromatography (petroleum ether/ethyl acetate = 3/1). Colorless oil; 58% yield;  $^1\text{H NMR}$  (400 MHz,  $\text{CDCl}_3$ )  $\delta$  (ppm) 7.37 (dd,  $J = 8.8, 2.3$  Hz, 1H), 7.27 (d,  $J = 8.4$  Hz, 2H), 7.19–7.06 (m, 10H), 3.51 (s, 3H), 3.25 (d,  $J = 17.4$  Hz, 1H), 3.19 (d,  $J = 17.4$  Hz, 1H), 1.18 (s, 9H);  $^{13}\text{C NMR}$  (100 MHz,  $\text{CDCl}_3$ )  $\delta$  (ppm) 196.3, 172.3, 167.4, 157.1, 137.1, 134.7, 132.4, 131.1, 129.3, 129.2, 128.9, 128.7, 128.6, 128.4, 125.0, 116.6, 92.0, 57.6, 38.8, 35.0, 30.8, 30.7; HRMS (ESI) for  $\text{C}_{29}\text{H}_{27}\text{NO}_4\text{Na}$   $[\text{M}+\text{Na}]^+$  calcd. 476.1832, found 476.1839.

*2-(4-(4-(tert-butyl)benzoyl)-1-methyl-2-oxo-3-phenyl-1,2,3,4-tetrahydroquinolin-3-yl)acetic acid (3d-II)*

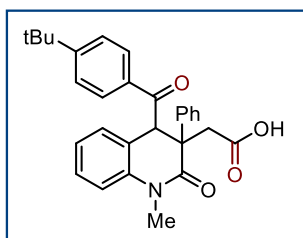

Purification by flash chromatography (petroleum ether/ethyl acetate = 1/1). White solid; mp 208-210°C; 61% yield;  $^1\text{H NMR}$  (400 MHz,  $\text{CDCl}_3$ )  $\delta$  (ppm) 8.04 (d,  $J = 8.4$  Hz, 2H), 7.53 (d,  $J = 8.4$  Hz, 2H), 7.27–7.19 (m, 4H), 7.17–7.08 (m, 3H), 6.94 (d,  $J = 8.1$  Hz, 1H), 6.83 (t,  $J = 7.5$  Hz, 1H), 5.40 (s, 1H), 3.58 (s, 3H), 3.54 (d,  $J = 14.8$  Hz, 1H), 2.86 (d,  $J = 14.8$  Hz, 1H), 1.35 (s, 9H);  $^{13}\text{C NMR}$  (100 MHz,  $\text{CDCl}_3$ )  $\delta$  (ppm) 196.5, 174.2, 171.4, 158.1, 139.1, 136.2, 132.8,

129.3, 128.9, 128.8, 128.1, 126.1, 126.0, 123.9, 122.2, 115.8, 54.4, 50.4, 44.1, 35.2, 31.0, 30.8; HRMS (ESI) for  $C_{29}H_{29}NO_4Na$   $[M+H]^+$  calcd. 478.1989, found 478.2004.

*2-(4-(4-(tert-butyl)benzoyl)-1-methyl-2-oxo-3-phenyl-1,2,3,4-tetrahydroquinolin-3-yl)-N-methylacetamide (3d-III)*

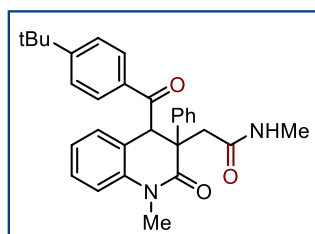

Purification by flash chromatography (petroleum ether/ethyl acetate = 3/2). White solid; mp 168-170°C; 54% yield;  $^1H$  NMR (400 MHz,  $CDCl_3$ )  $\delta$  (ppm) 7.78 (d,  $J = 8.4$  Hz, 2H), 7.49 (d,  $J = 7.7$  Hz, 2H), 7.38 (d,  $J = 8.4$  Hz, 2H), 7.27–7.22 (m, 1H), 7.20–7.12 (m, 3H), 7.09 (t,  $J = 7.3$  Hz, 1H), 7.00 (d,  $J = 8.1$  Hz, 1H), 6.94 (t,  $J = 7.4$  Hz, 1H), 6.18 (q,  $J = 4.2$  Hz, 1H), 5.51 (s, 1H), 3.51 (s, 3H), 3.11 (d,  $J = 16.0$  Hz, 1H), 2.89 (d,  $J = 16.0$  Hz, 1H), 2.49 (d,  $J = 4.7$  Hz, 3H), 1.30 (s, 9H);  $^{13}C$  NMR (100 MHz,  $CDCl_3$ )  $\delta$  (ppm) 196.9, 171.8, 170.0, 157.0, 139.5, 137.8, 133.6, 129.0, 128.6, 128.6, 128.5, 127.8, 126.9, 125.6, 123.3, 123.1, 115.2, 53.7, 49.6, 43.2, 35.0, 31.0, 30.7, 26.2; HRMS (ESI) for  $C_{30}H_{32}N_2O_3Na$   $[M+Na]^+$  calcd. 491.2305, found 491.2316.

*ethyl 2-(4-(4-(tert-butyl)benzoyl)-1-methyl-2-oxo-3-phenyl-1,2,3,4-tetrahydroquinolin-3-yl)acetate (3d-IV)*

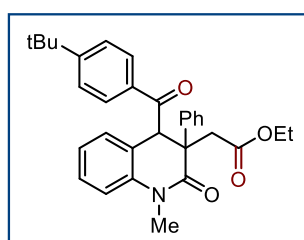

Purification by flash chromatography (petroleum ether/ethyl acetate = 3/1). Colorless oil; 58% yield;  $^1H$  NMR (400 MHz,  $CDCl_3$ )  $\delta$  (ppm) 8.15 (d,  $J = 8.4$  Hz, 2H), 7.53 (d,  $J = 8.5$  Hz, 2H), 7.38 (d,  $J = 7.7$  Hz, 2H), 7.25 (d,  $J = 6.8$  Hz, 2H), 7.21–7.16 (m, 2H), 7.12 (d,  $J = 7.2$  Hz, 1H), 7.07–7.02 (m, 1H), 6.83 (d,  $J = 7.4$  Hz, 1H), 6.74 (d,  $J = 8.1$  Hz, 1H), 6.19 (s, 1H), 3.88–3.74 (m, 2H), 3.47 (d,  $J = 15.7$  Hz, 1H), 3.40 (s, 3H), 2.95 (d,  $J = 15.7$  Hz, 1H), 1.35 (s, 9H), 0.89 (t,  $J = 7.1$  Hz, 3H);  $^{13}C$  NMR (100 MHz,  $CDCl_3$ )  $\delta$  (ppm) 197.2, 171.7, 170.7, 157.2, 139.8, 137.5, 133.4, 129.6, 129.2, 128.3, 128.2, 127.2, 126.9, 125.7, 122.7, 122.2, 115.3, 60.1, 48.9, 48.7, 41.0, 35.1, 31.0, 30.5, 13.8; HRMS (ESI) for  $C_{31}H_{33}NO_4Na$   $[M+Na]^+$  calcd. 506.2302, found 506.2309.

ethyl 2-(2,2,5-trimethyl-4-oxo-1-phenyl-2,3,4,5-tetrahydro-3aH-cyclopenta[c]quinolin-3a-yl)acetate (3y')

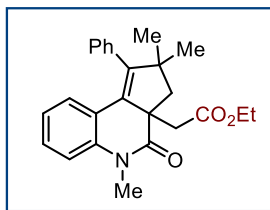

Purification by flash chromatography (petroleum ether/ethyl acetate = 8/1). Colorless oil; 58% yield;  $^1\text{H NMR}$  (400 MHz,  $\text{CDCl}_3$ )  $\delta$  (ppm) 7.37–7.29 (m, 3H), 7.19–7.14 (m, 1H), 7.11–7.09 (m, 2H), 7.01 (d,  $J$  = 8.2 Hz, 1H), 6.71 (d,  $J$  = 4.0 Hz, 2H), 4.03–3.90 (m, 2H), 3.42 (s, 3H), 2.64–2.40 (m, 4H), 1.38 (s, 3H), 1.19 (t,  $J$  = 7.1 Hz, 3H), 0.99 (s, 3H);  $^{13}\text{C NMR}$  (100 MHz,  $\text{CDCl}_3$ )  $\delta$  (ppm) 172.7, 170.2, 150.2, 139.6, 136.2, 130.8, 129.0, 128.3, 128.1, 127.5, 127.2, 122.3, 121.4, 114.7, 60.6, 54.3, 48.0, 46.1, 43.3, 30.1, 29.4, 29.0, 14.1; HRMS (ESI) for  $\text{C}_{25}\text{H}_{28}\text{NO}_3$   $[\text{M}+\text{H}]^+$  calcd. 390.2064, found 390.2072.

## 9. References

- 1 B. A. L. Sacchelli, B. C. Rocha, L. H. Andrade, Cascade reactions assisted by microwave irradiation: ultrafast construction of 2-quinolinone-fused  $\gamma$ -lactones from *N*-(*o*-ethynylaryl)acrylamides and formamide, *Org. Lett.*, 2021, **23**, 5071–5075.
- 2 Z. Cao, D. M. Bassani and B. Bibal, Photoreduction of thioether gold(III) complexes: mechanistic insight and homogeneous catalysis, *Chem. Eur. J.* 2018, **24**, 18779–18787.

# 10. NMR spectra of compounds

## 6-methyl-1,4a-diphenyl-4,4a-dihydro-3H-pyranof[4,3-c]quinoline-3,5(6H)-dione (3a)

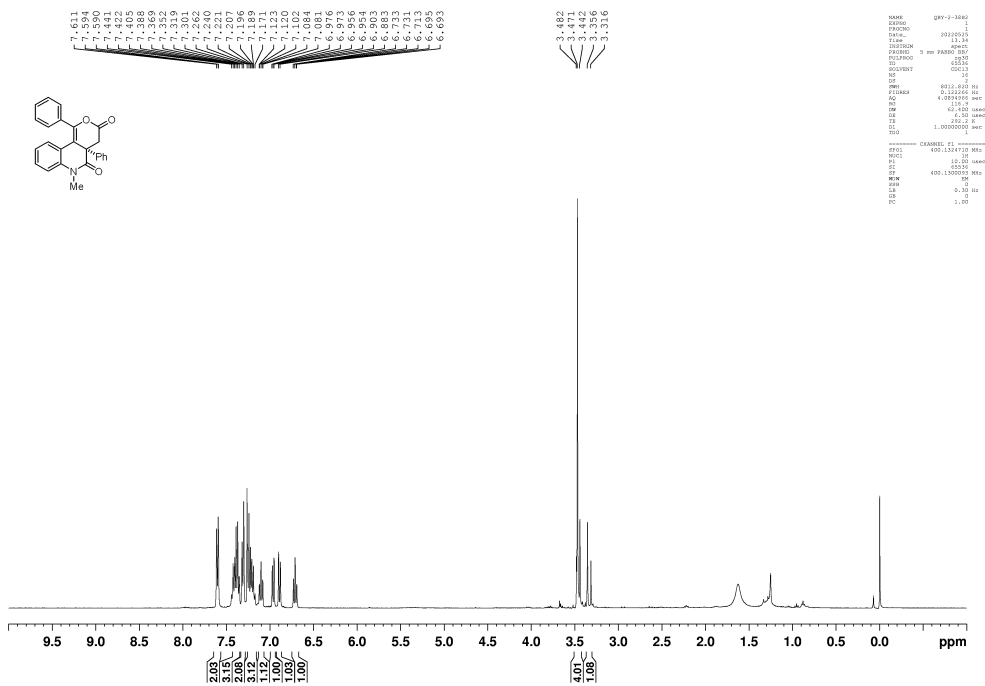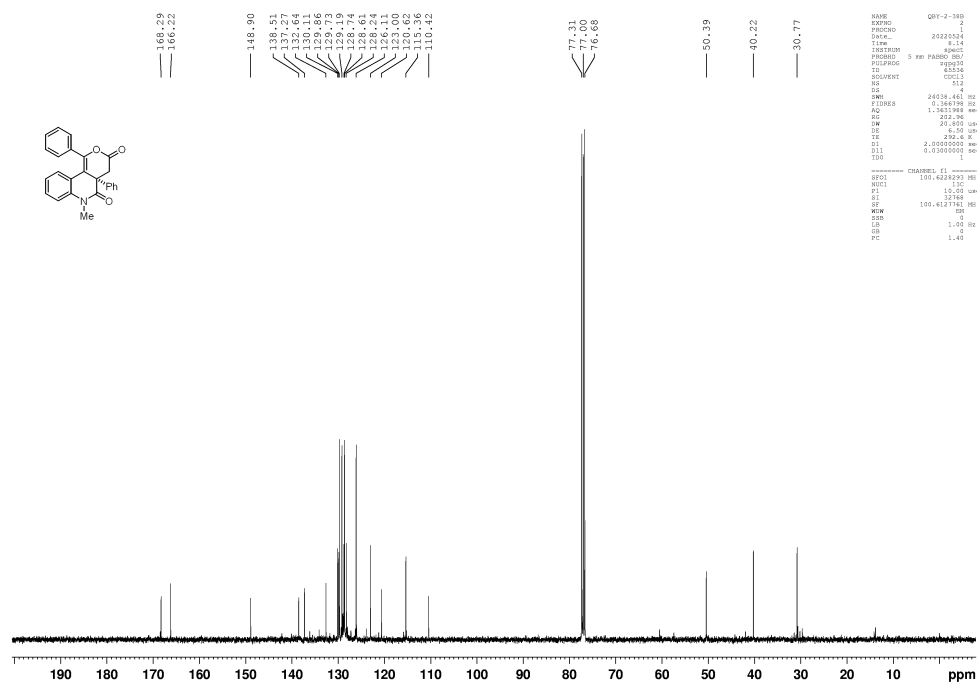













9-chloro-6-methyl-1,4a-diphenyl-4,4a-dihydro-3H-pyranof[4,3-c]quinoline-3,5(6H)-dione  
(3g)

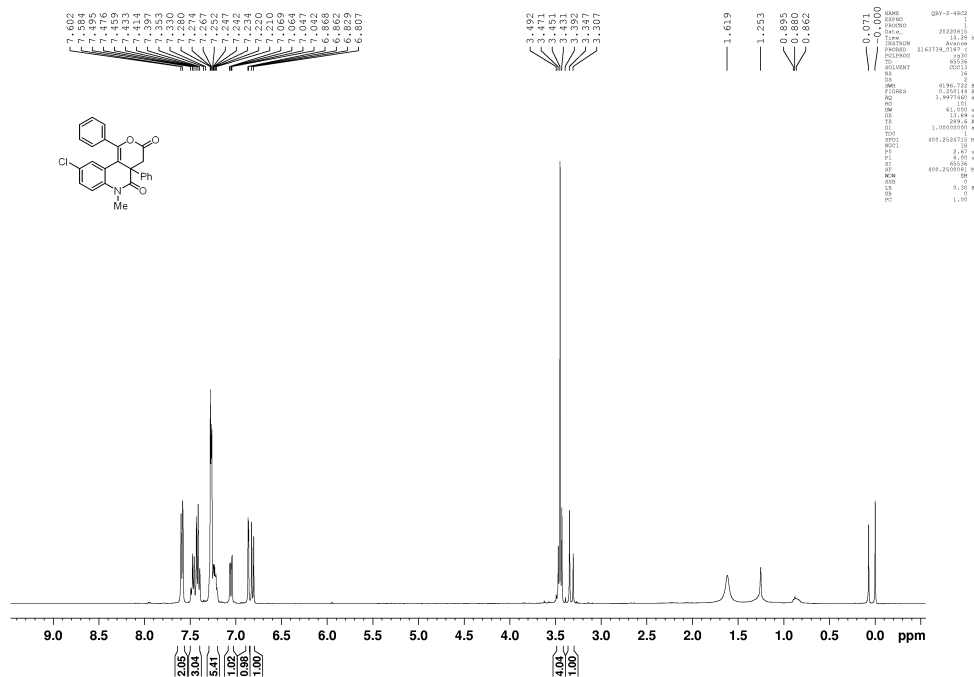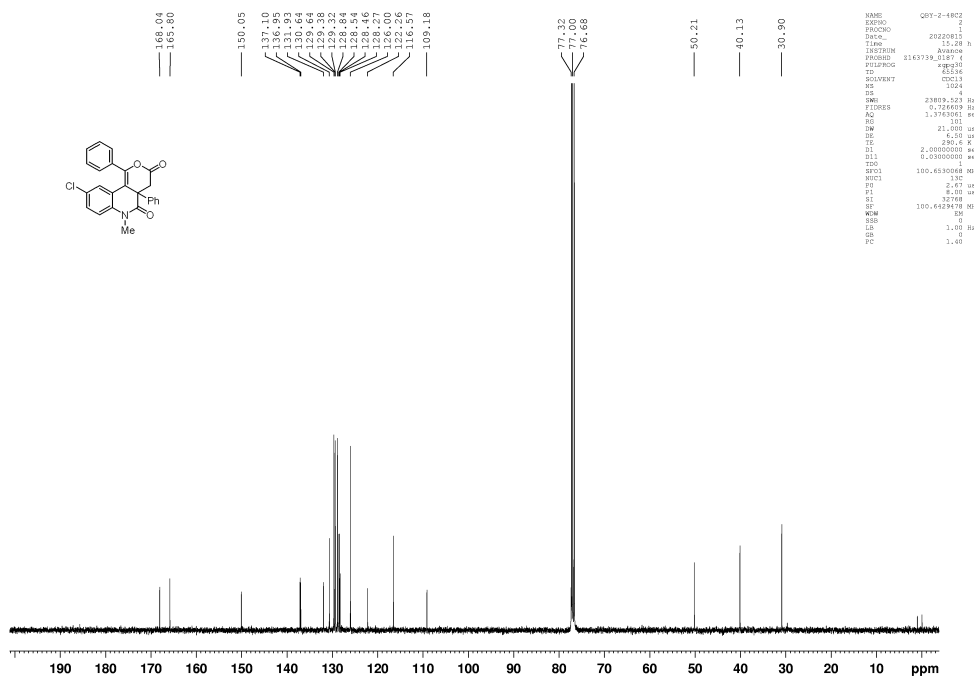

**9-bromo-6-methyl-1,4a-diphenyl-4,4a-dihydro-3H-pyranof[4,3-c]quinoline-3,5(6H)-dione**  
**(3h)**

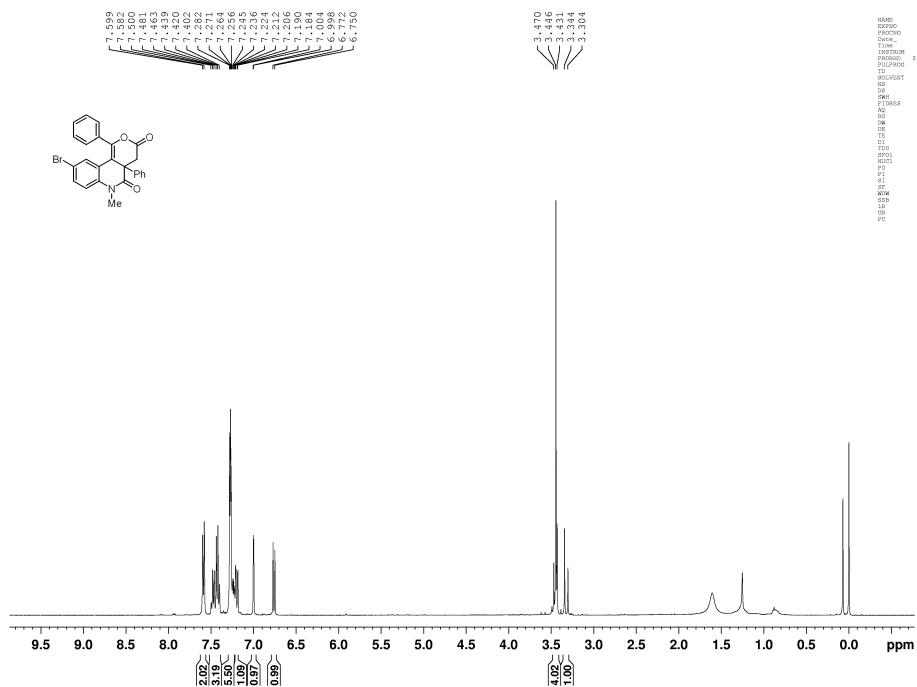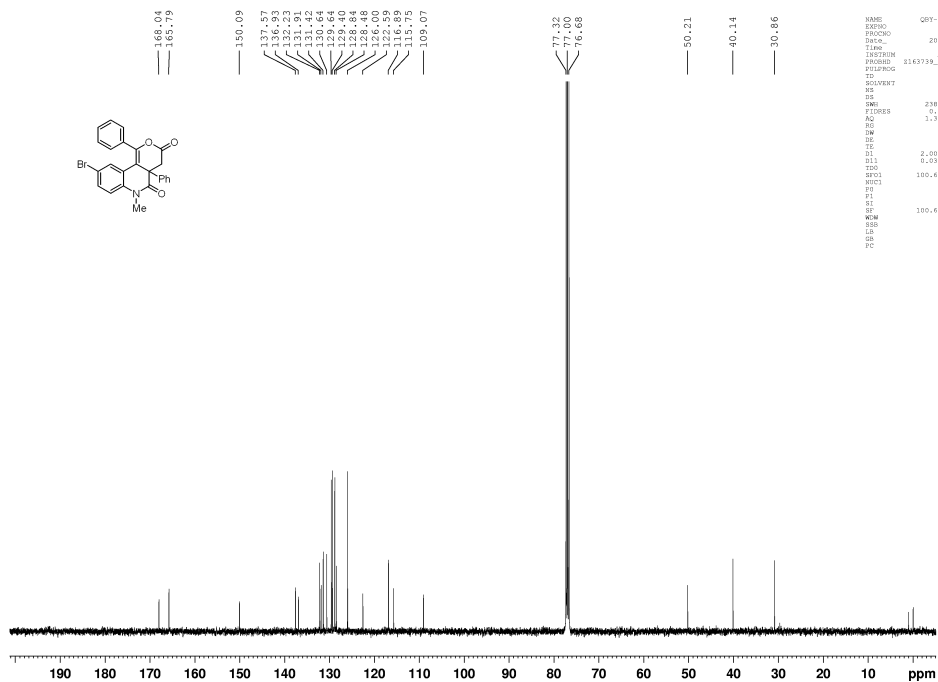

6-methyl-3,5-dioxo-1,4a-diphenyl-4,4a,5,6-tetrahydro-3H-pyran[4,3-c]quinoline-9-carbonitrile (3i)

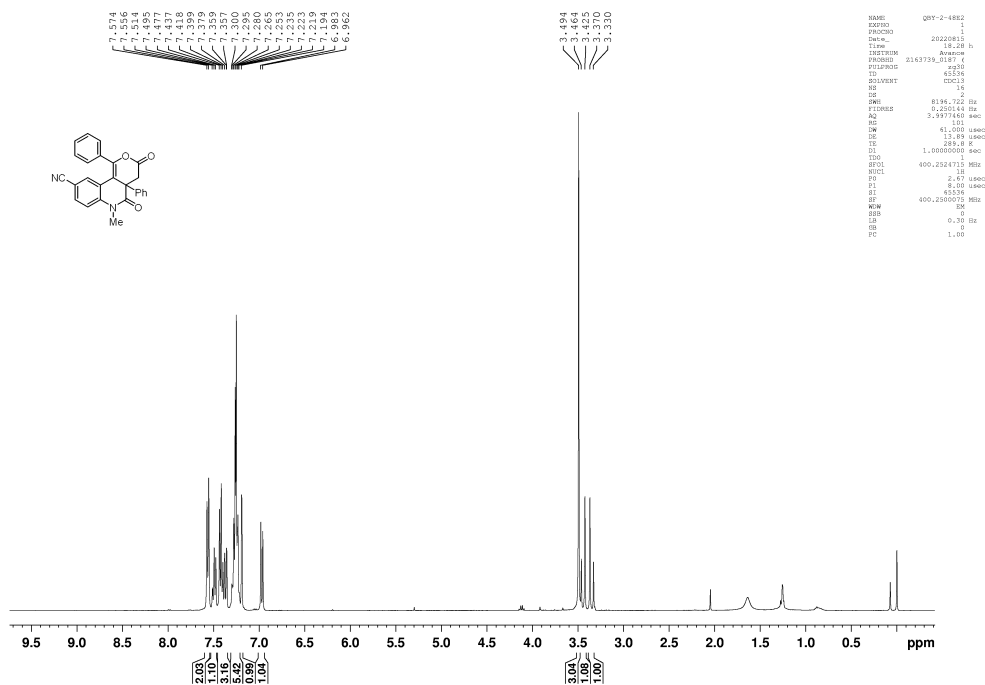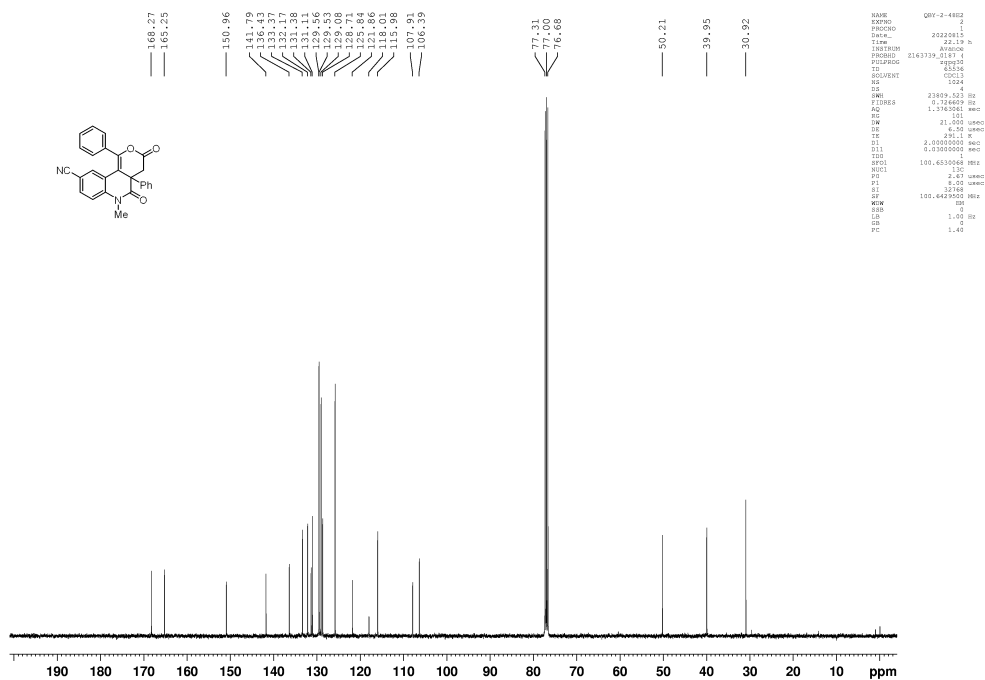

4a,6-dimethyl-1-phenyl-4,4a-dihydro-3H-pyrano[4,3-c]quinoline-3,5(6H)-dione (3j)

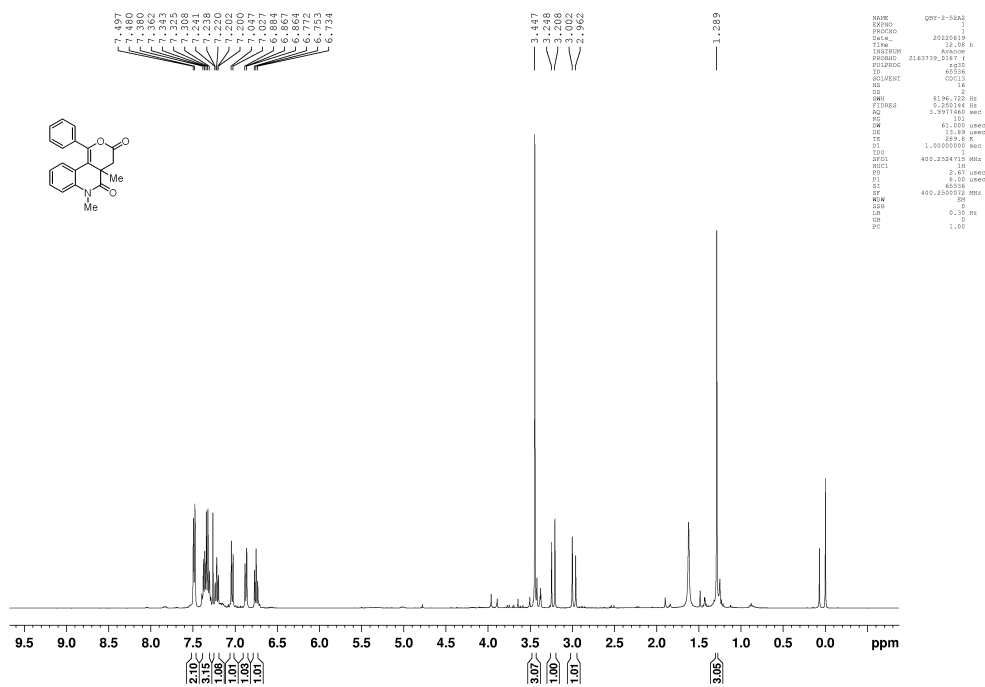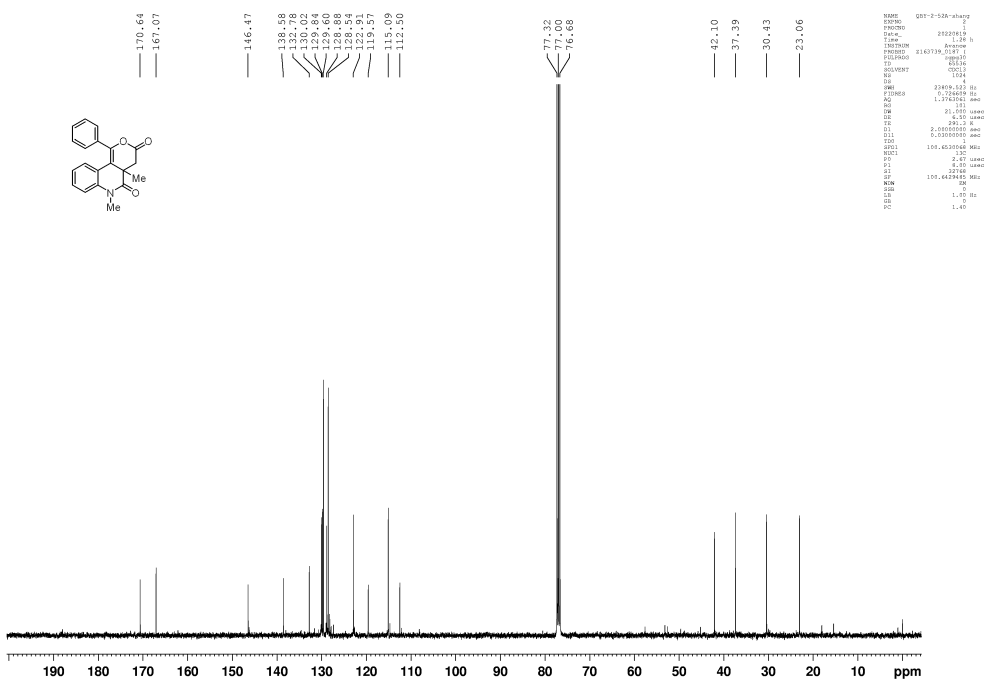

**4a,6-dimethyl-1-(p-tolyl)-4,4a-dihydro-3H-pyrano[4,3-c]quinoline-3,5(6H)-dione (3k)**

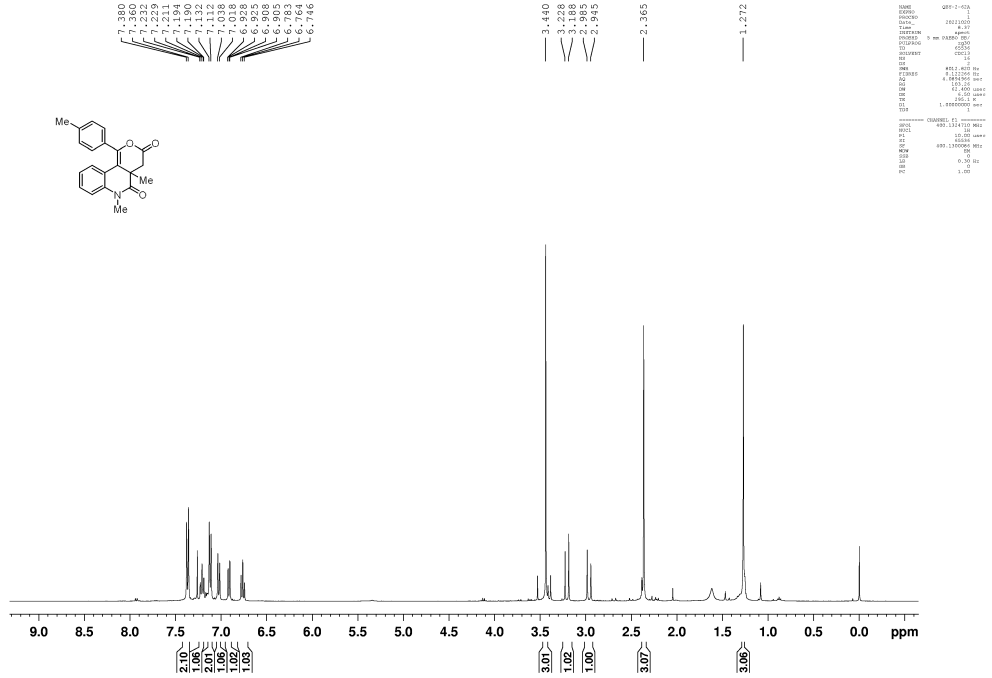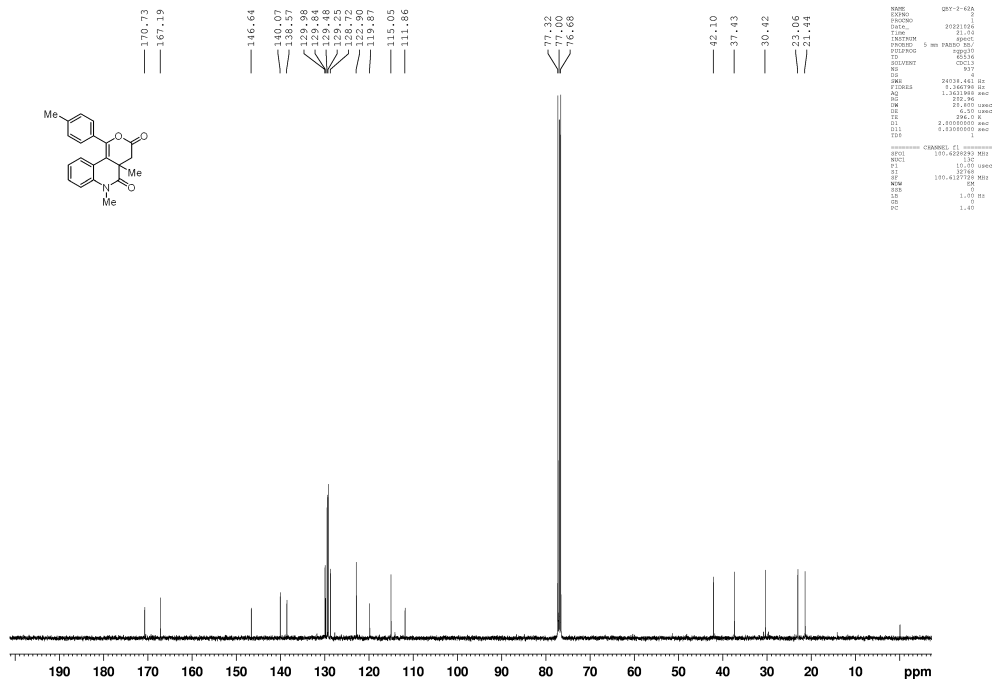

**4a,6-dimethyl-1-(m-tolyl)-4,4a-dihydro-3H-pyrano[4,3-c]quinoline-3,5(6H)-dione**  
**(3l)**

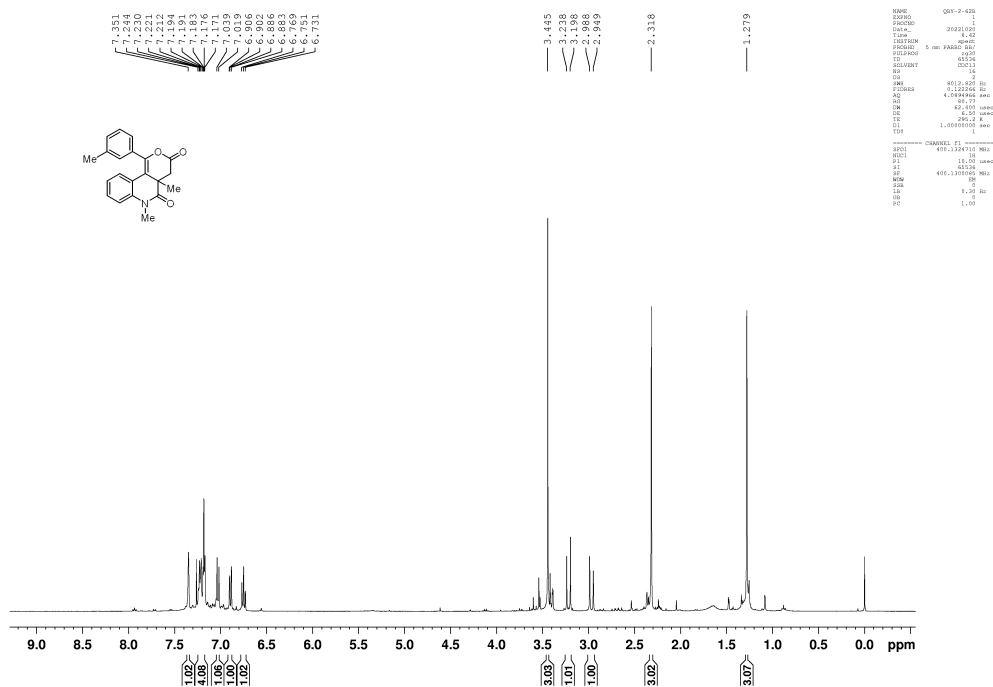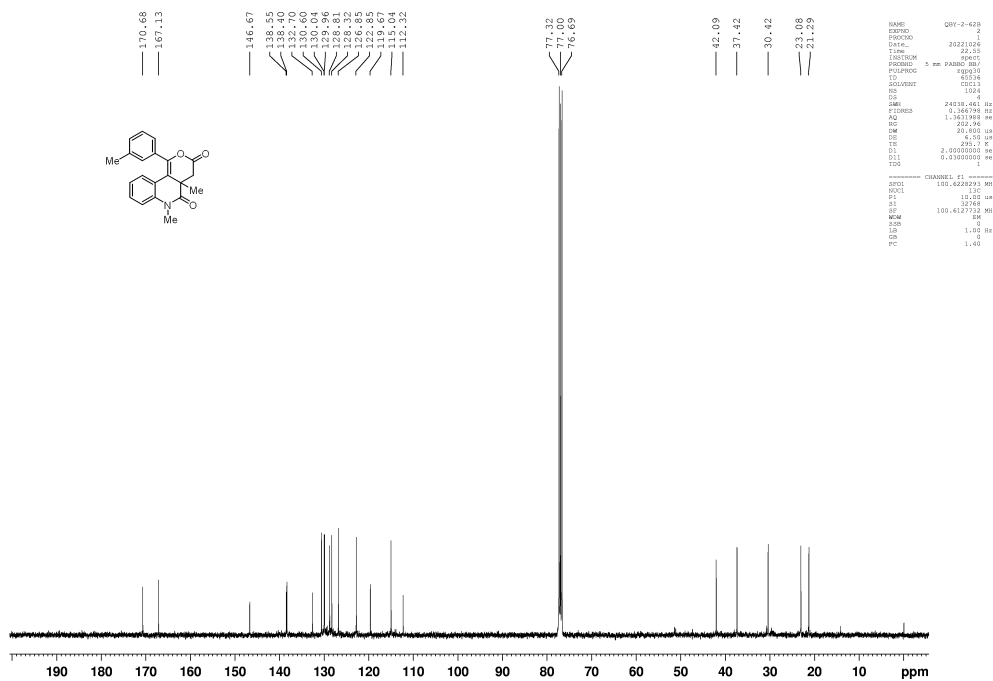





**4a,6-dimethyl-1-phenyl-9-(trifluoromethyl)-4,4a-dihydro-3H-pyrano[4,3-c]quinoline-3,5(6H)-dione (3n)**

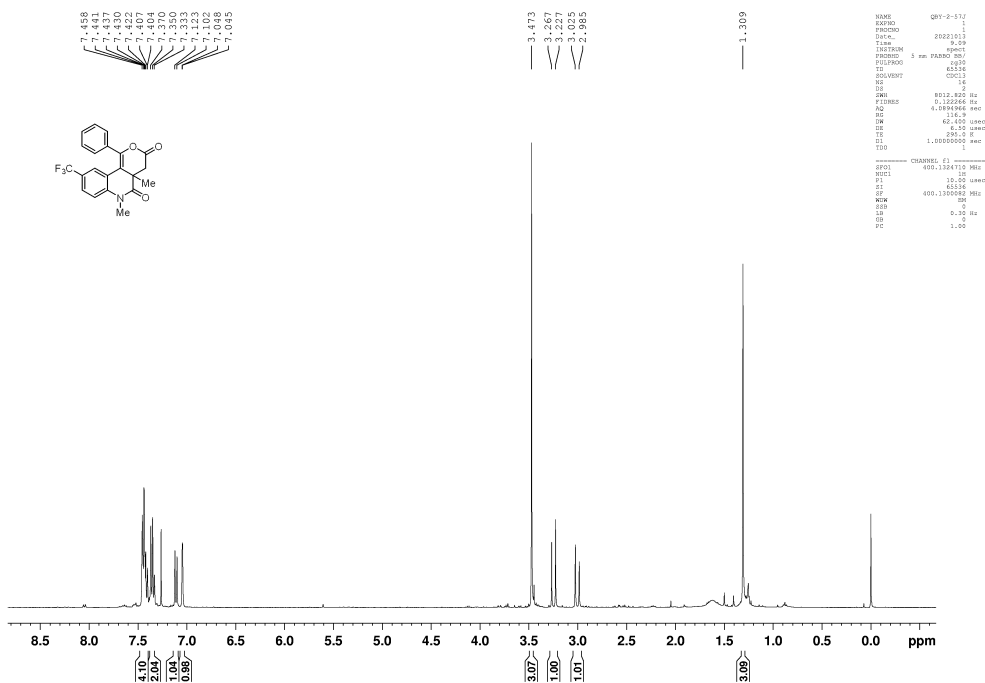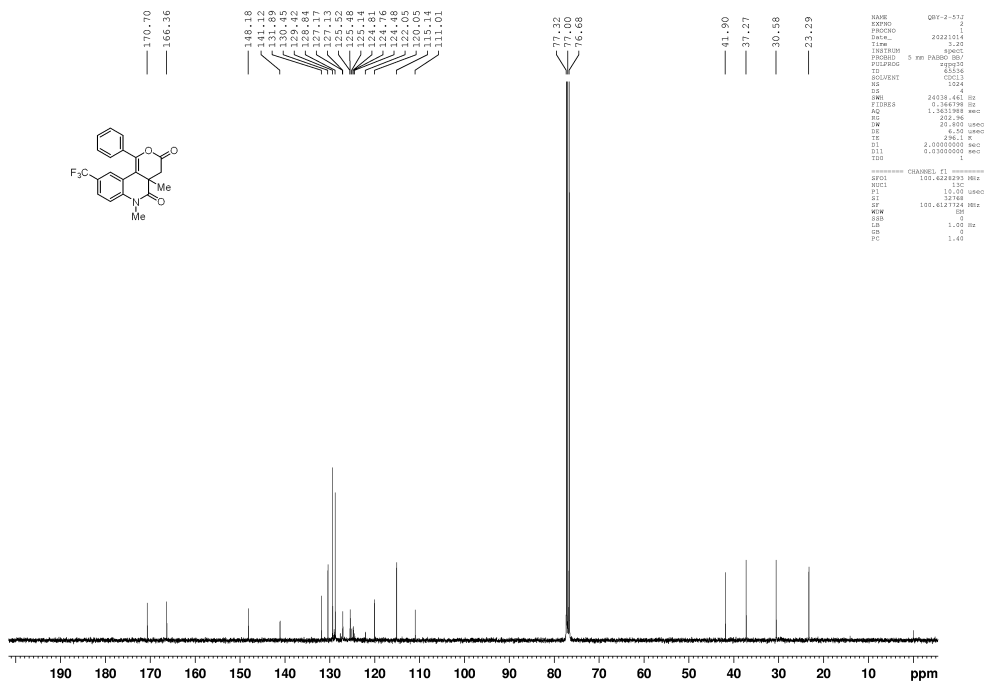

9-fluoro-4a,6-dimethyl-1-phenyl-4,4a-dihydro-3H-pyrano[4,3-c]quinoline-3,5(6H)-dione (3o)

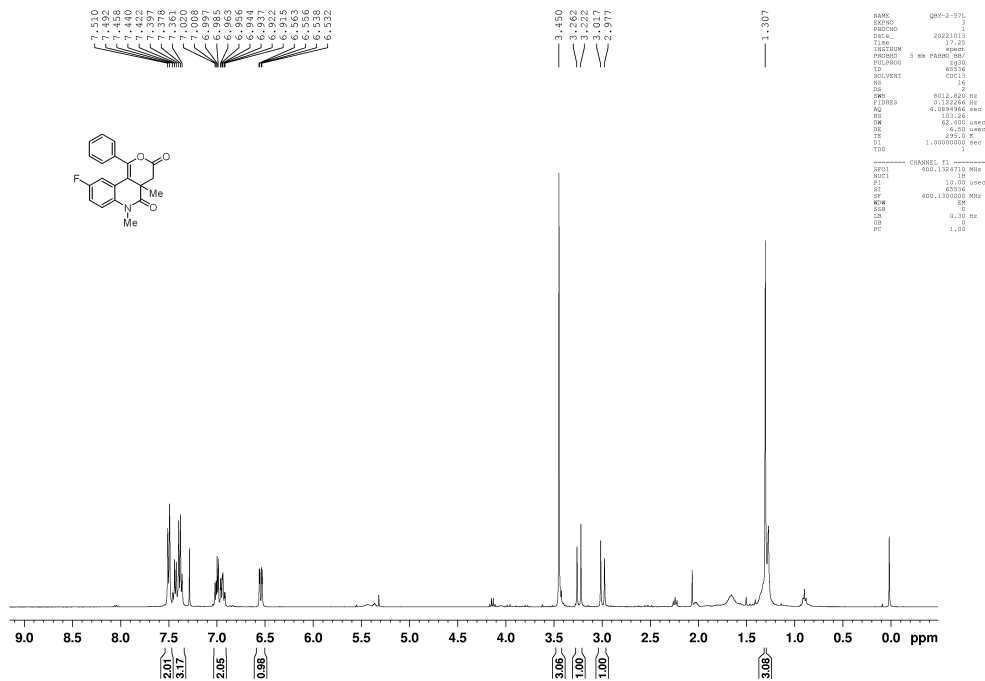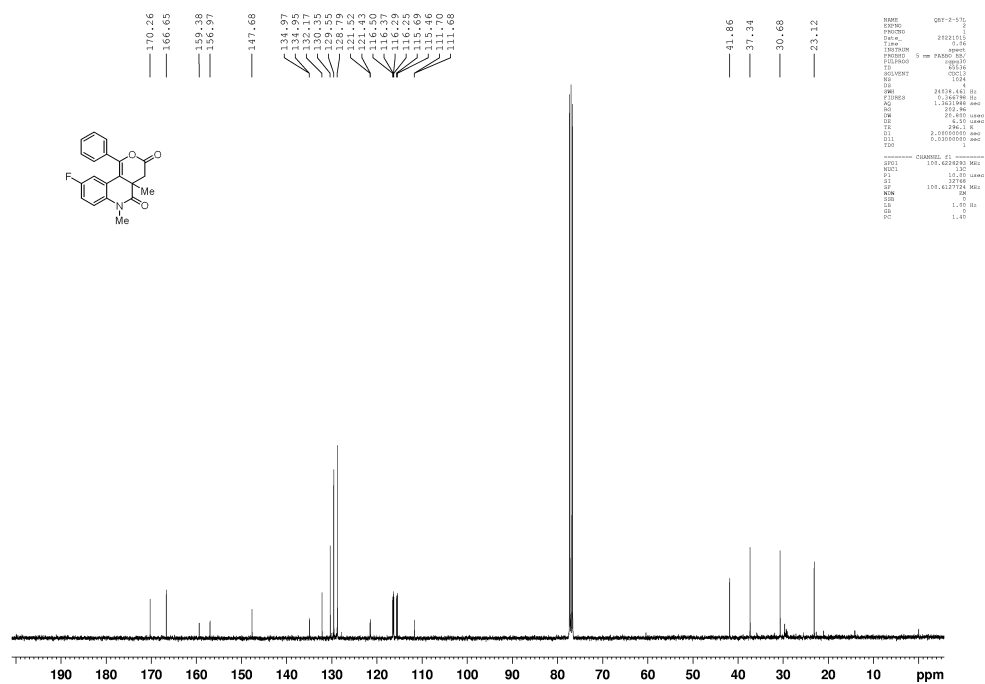

6-ethyl-4a-methyl-1-phenyl-4,4a-dihydro-3H-pyrano[4,3-c]quinoline-3,5(6H)-dione (3p)

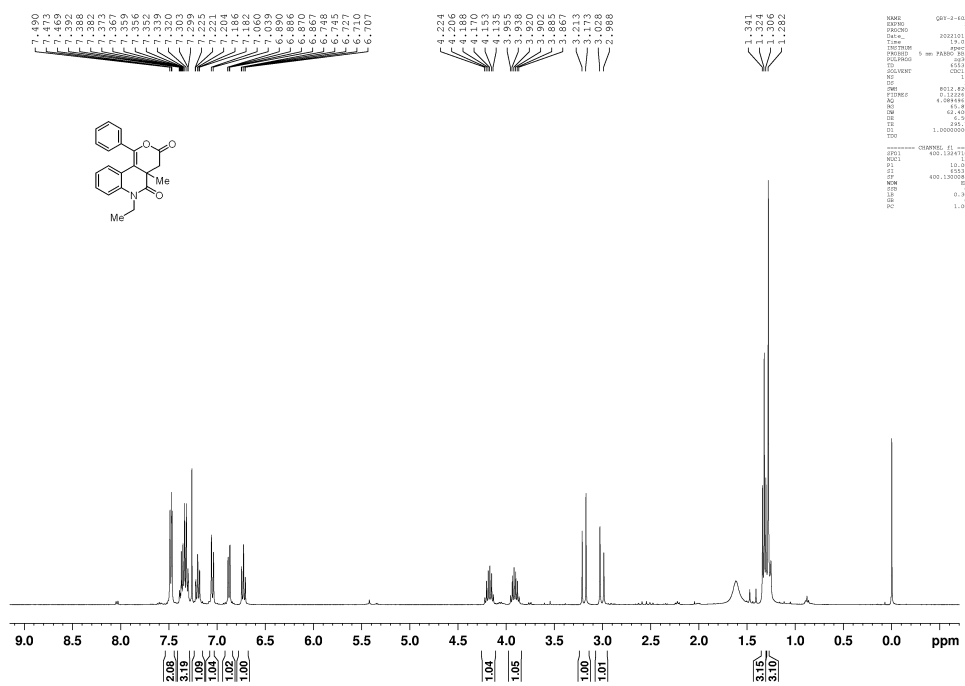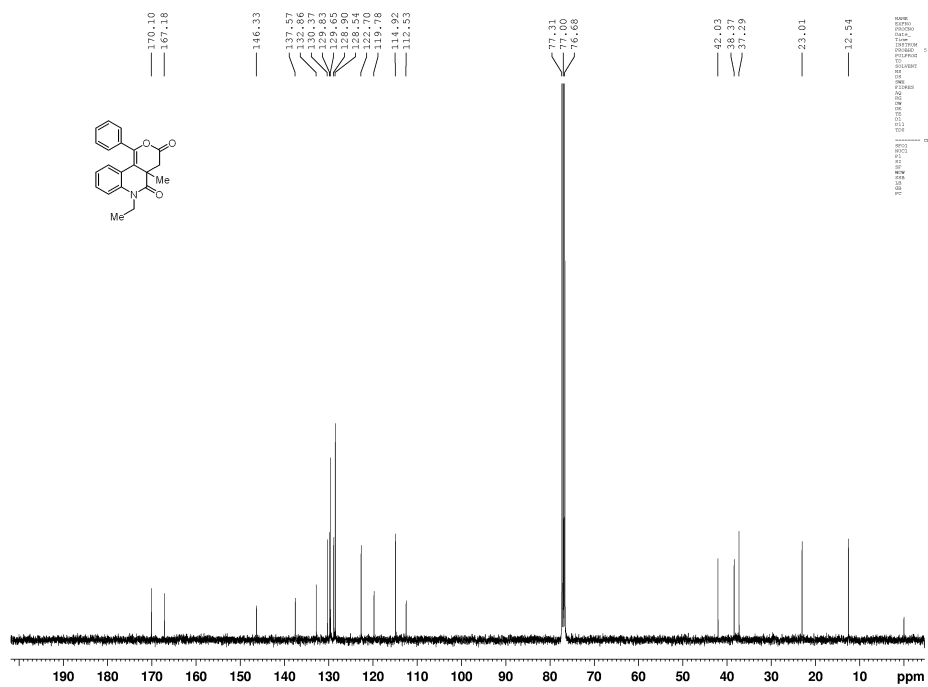

6-benzyl-4a-methyl-1-phenyl-4,4a-dihydro-3H-pyrano[4,3-c]quinoline-3,5(6H)-dione (3g)

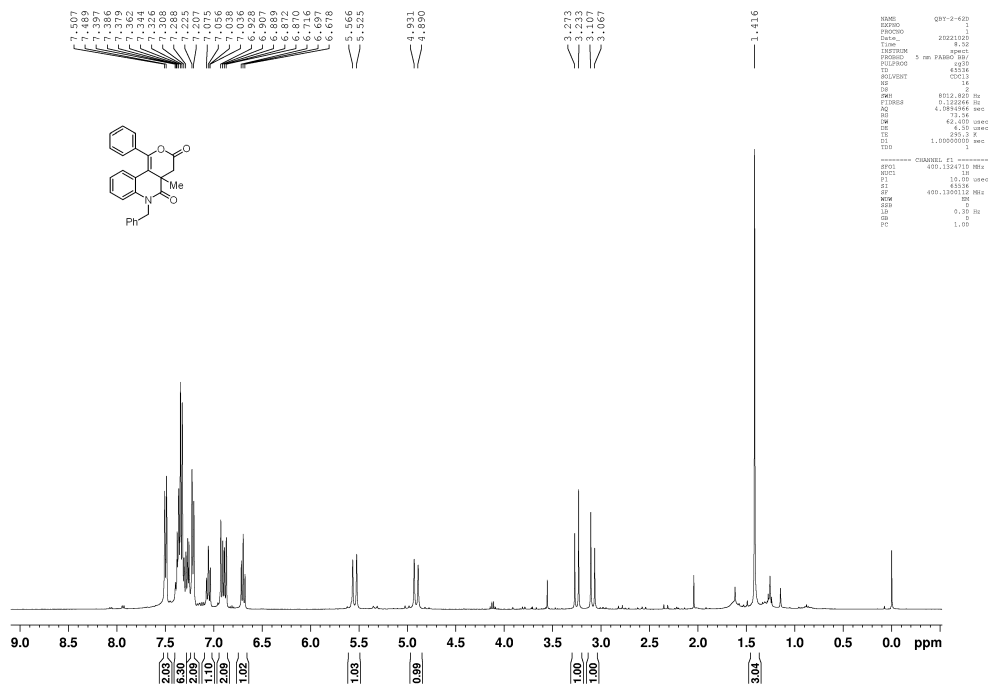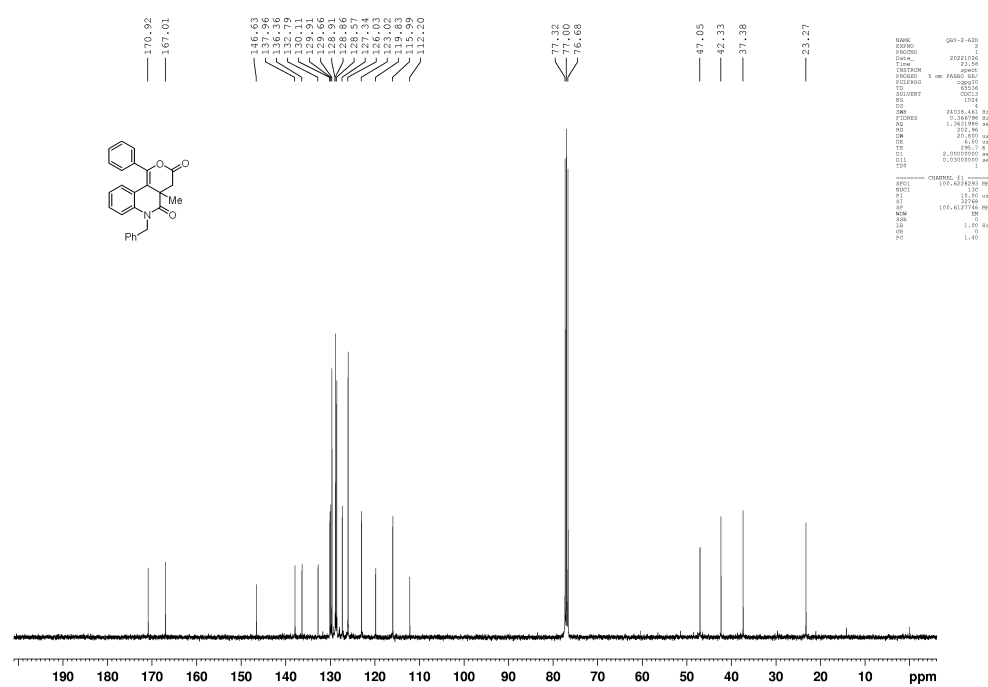

6-allyl-4a-methyl-1-phenyl-4,4a-dihydro-3H-pyrano[4,3-c]quinoline-3,5(6H)-dione (3r)

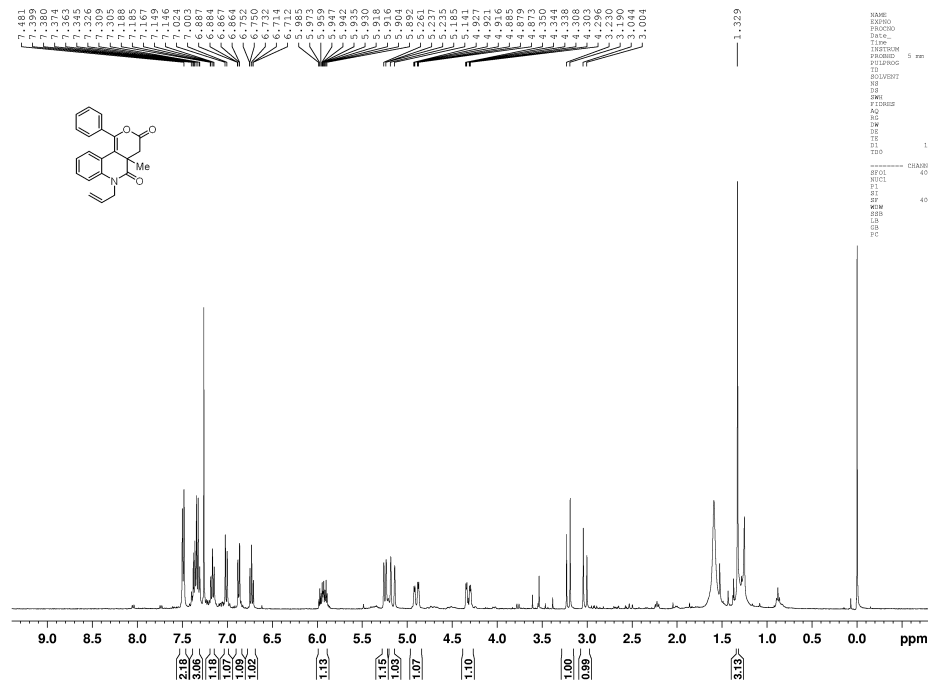

NAME: QM7-2-00b  
 EXPNO: 1  
 PROCNO: 20221014  
 Type: 1d  
 INSTRUM: spect  
 PROBRD: 5 mm PABBO 90/1  
 PULPROG: zgpg30  
 IS: 100.625  
 SOLVENT: CDCl3  
 NS: 4  
 DS: 4  
 SWH: 8012.8200 Hz  
 FIDRES: 0.122244 Hz  
 AQ: 4.18029319 sec  
 RG: 681  
 DW: 62.4500 usec  
 DE: 6.150 usec  
 TE: 295.2 K  
 D1: 1.00000000 sec  
 TDO: 1

CHANNEL f1  
 SF01: 400.132410 MHz  
 NUC1: 13C  
 P1: 10.00 usec  
 PL: 0.00 dB  
 SFO2: 400.130000 MHz  
 NUC2: 1H  
 P2: 0.30 usec  
 PL2: 1.00 dB

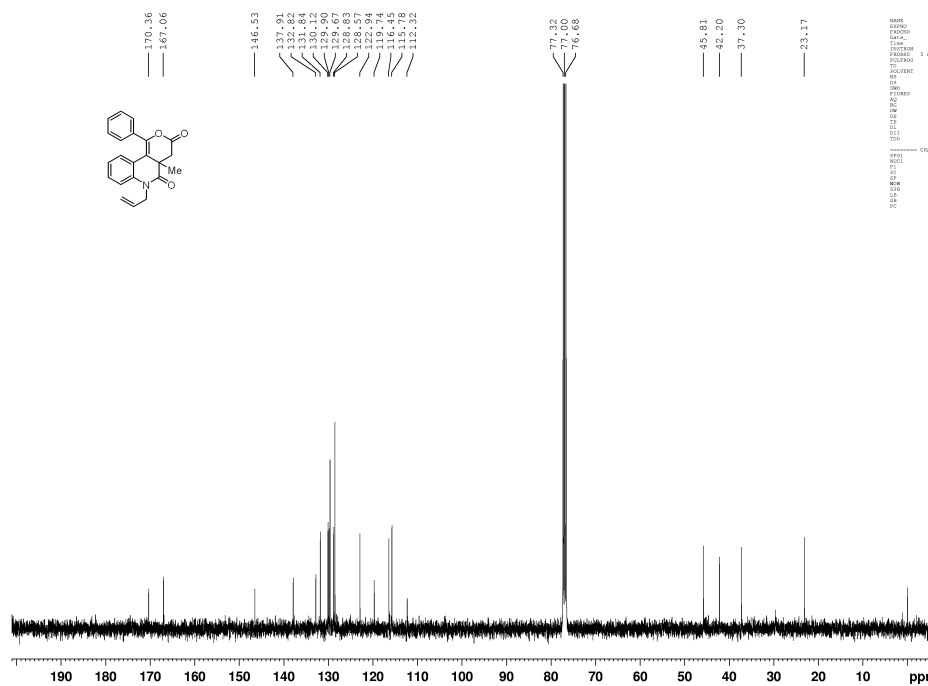

NAME: QM7-2-00b  
 EXPNO: 1  
 PROCNO: 20221014  
 Type: 1d  
 INSTRUM: spect  
 PROBRD: 5 mm PABBO 90/1  
 PULPROG: zgpg30  
 IS: 100.625  
 SOLVENT: CDCl3  
 NS: 4  
 DS: 4  
 SWH: 24038.4400 Hz  
 FIDRES: 1.14818000 Hz  
 AQ: 2.02130 usec  
 RG: 681  
 DW: 62.4500 usec  
 DE: 6.150 usec  
 TE: 295.2 K  
 D1: 2.00000000 sec  
 TDO: 0.13000000 sec

CHANNEL f1  
 SF01: 100.625000 MHz  
 NUC1: 13C  
 P1: 10.00 usec  
 PL: 0.00 dB  
 SFO2: 100.617000 MHz  
 NUC2: 1H  
 P2: 0.30 usec  
 PL2: 1.00 dB

4a-methyl-1-phenyl-6-(prop-2-yn-1-yl)-4,4a-dihydro-3H-pyrano[4,3-c]quinoline-3,5(6H)-dione

(3s)

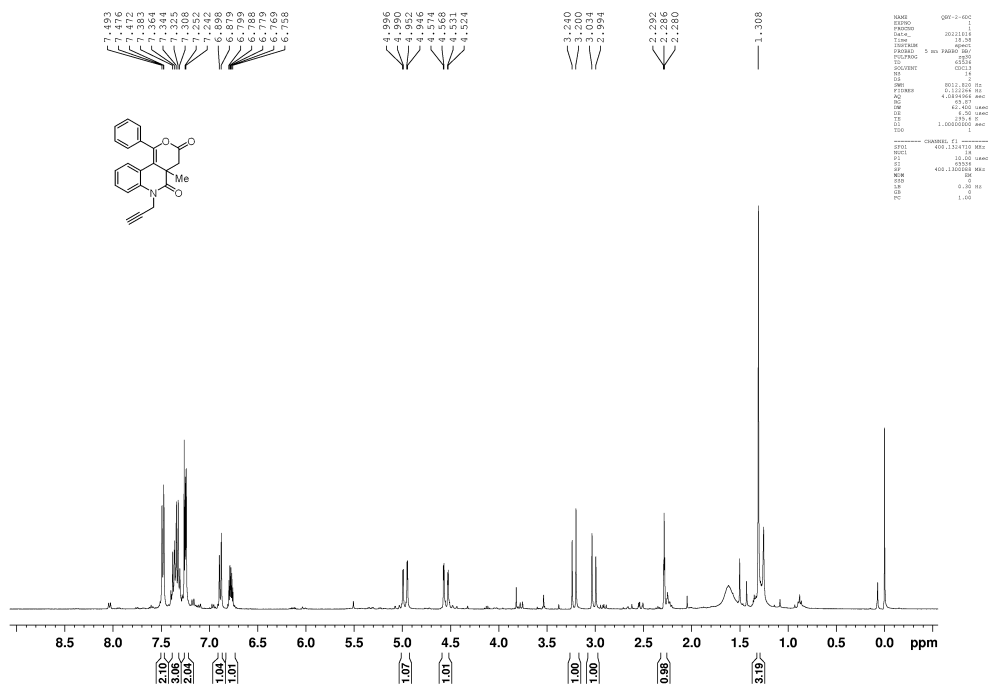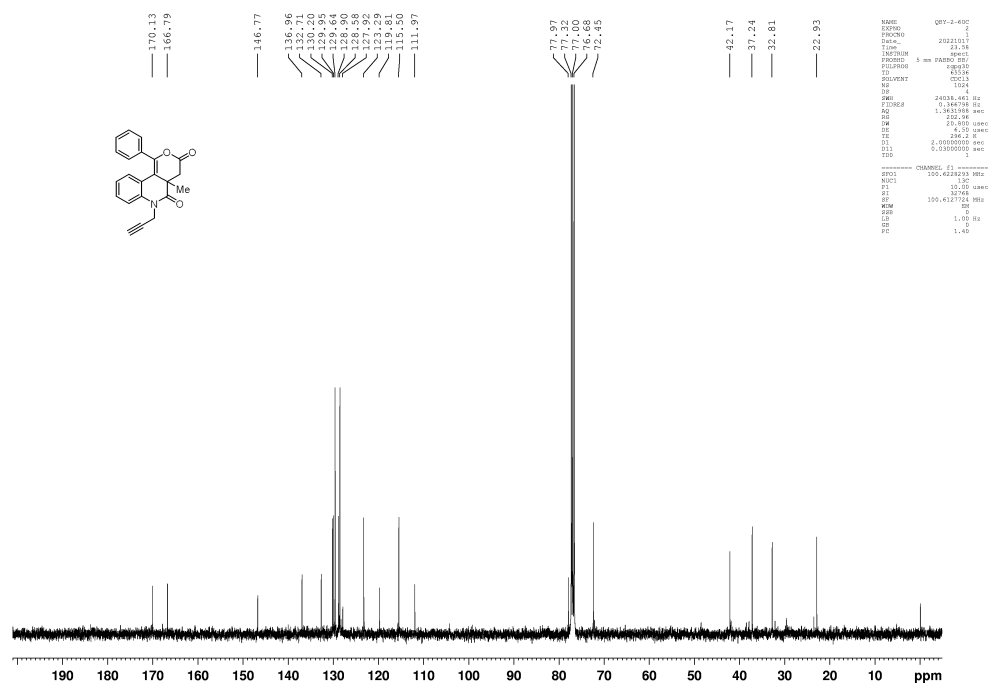

**9b-(4-(tert-butyl)benzoyl)-5-methyl-3a-phenyl-3,3a,5,9b-tetrahydrofuro[3,2-c]quinoline-2,4-dione (3d-I)**

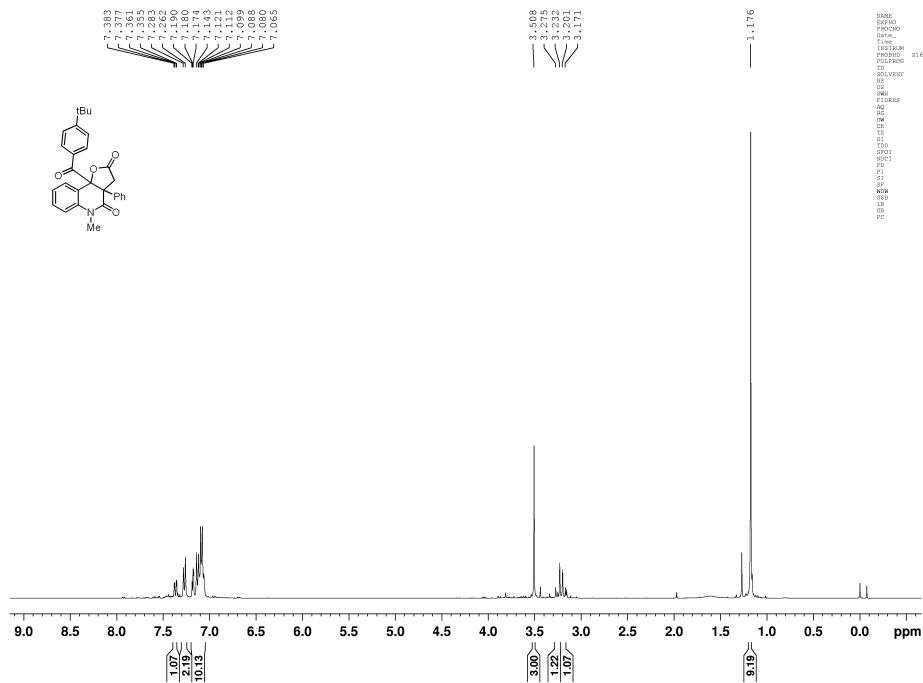

```

NAME      QM7-2-50H
EXPNO     1
PROCNO    1
Date_     20220921
Time      16:20:30
INSTRUM   Avance
PROBHD    5mm QNP1H
PULPROG   zgpg30
TD         65536
SOLVENT   CDCl3
NS         512
DS         4
AQ         0.1967120
RG         320
FIDRES    0.210144
AQ         3.9971600
SFO        400.1500000
AQ         12.89
SI         390.5
SF         1.000000000
AQ         1.000000000
SFO1       400.2524715
SI         16
SI         2.07
SI         8.00
SF         400.250574
SI         16
SFO        400.1500000
SI         16
SI         0.10
SI         1.00
  
```

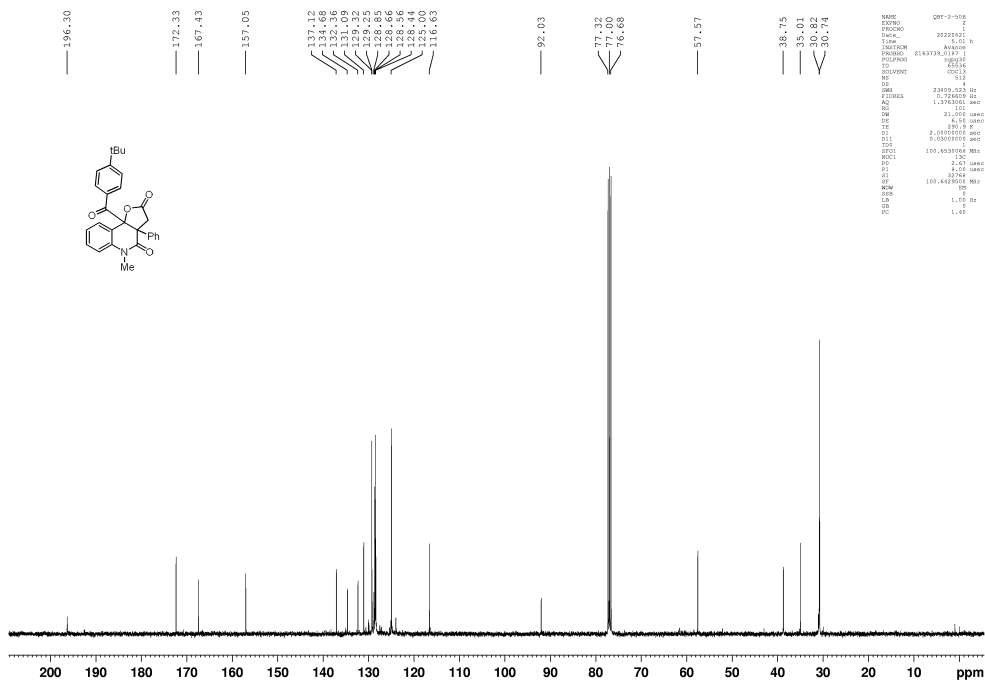

```

NAME      QM7-2-50I
EXPNO     2
PROCNO    1
Date_     20220921
Time      16:22:30
INSTRUM   Avance
PROBHD    5mm QNP1H
PULPROG   zgpg30
TD         65536
SOLVENT   CDCl3
NS         512
DS         4
AQ         0.2305430
RG         320
FIDRES    0.2284000
AQ         1.7284000
SFO        400.1500000
AQ         12.89
SI         390.5
SF         1.000000000
AQ         1.000000000
SFO1       100.6260641
SI         16
SI         2.07
SI         8.00
SF         100.6260641
SI         16
SFO        100.6260641
SI         16
SI         1.00
SI         1.40
  
```



**2-(4-(4-(tert-butyl)benzoyl)-1-methyl-2-oxo-3-phenyl-1,2,3,4-tetrahydroquinolin-3-yl)acetic acid**  
**(3d-II)**

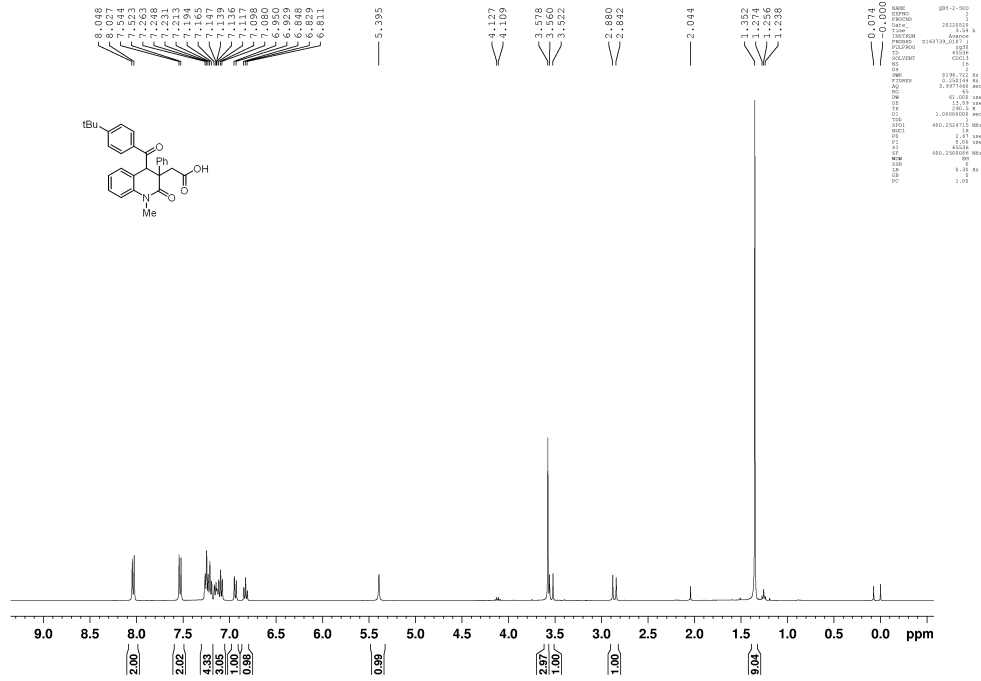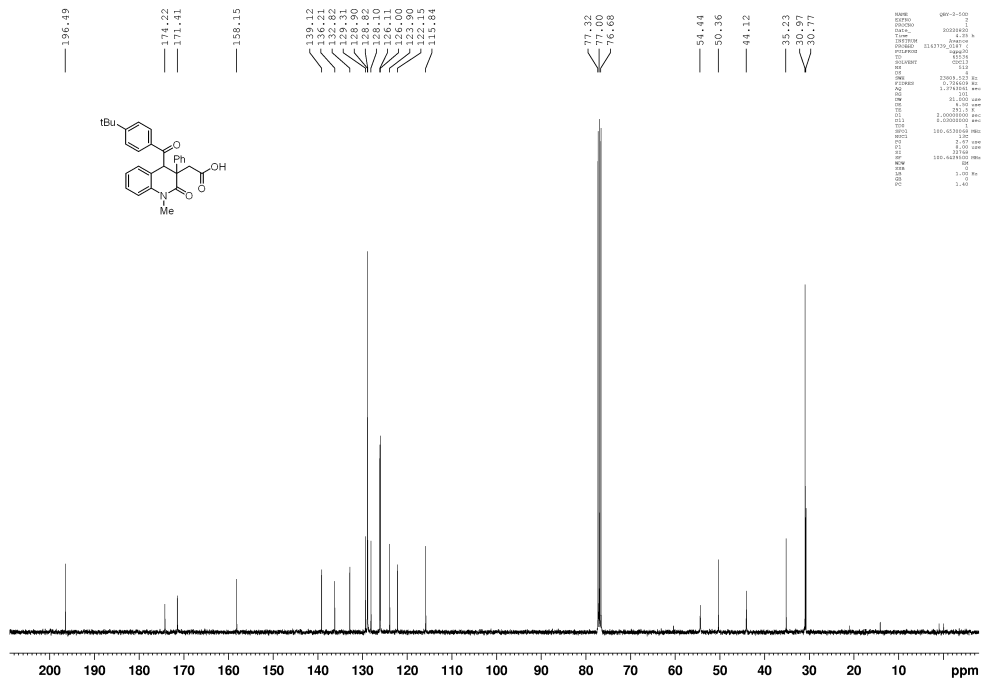

**2-(4-(4-(tert-butyl)benzoyl)-1-methyl-2-oxo-3-phenyl-1,2,3,4-tetrahydroquinolin-3-yl)-N-methylacetamide (3d-III)**

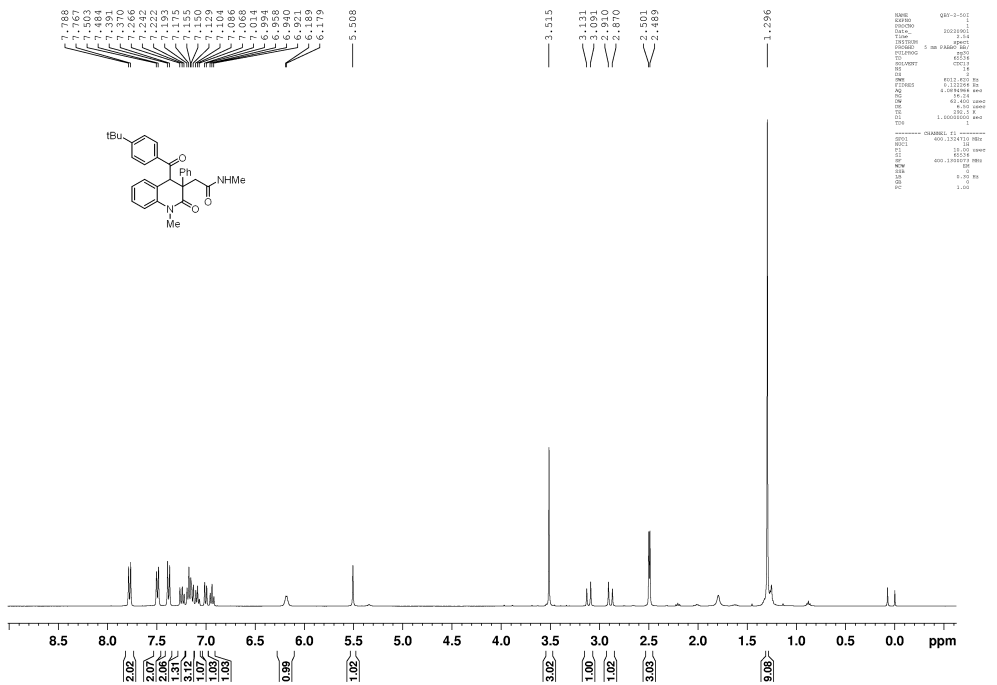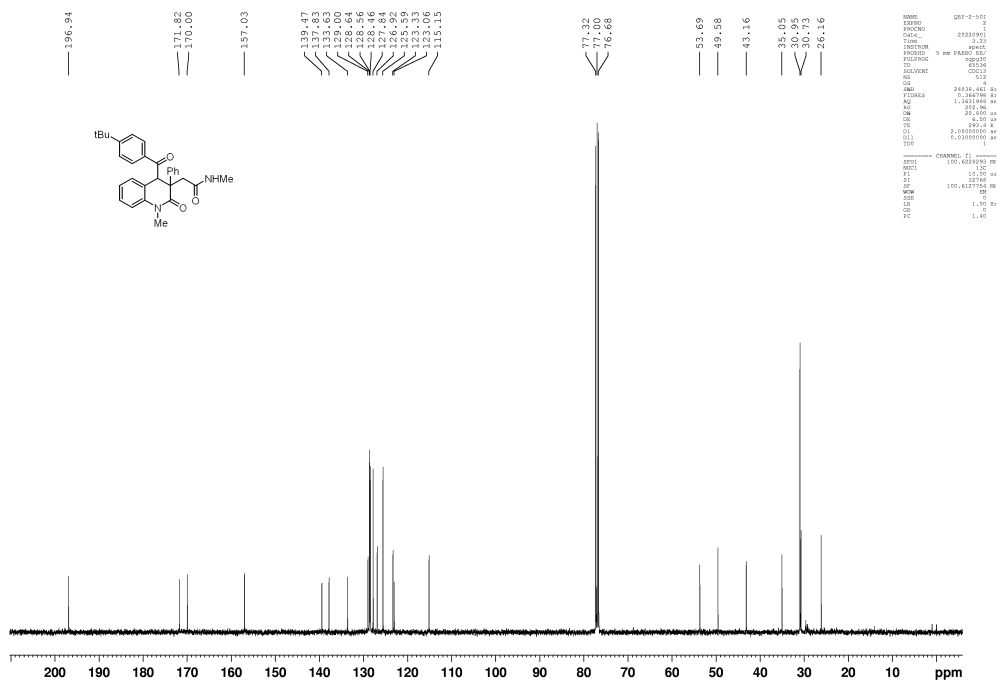



ethyl 2-(2,2,5-trimethyl-4-oxo-1-phenyl-2,3,4,5-tetrahydro-3aH-cyclopenta[c]quinolin-3a-yl)acetate (3y')

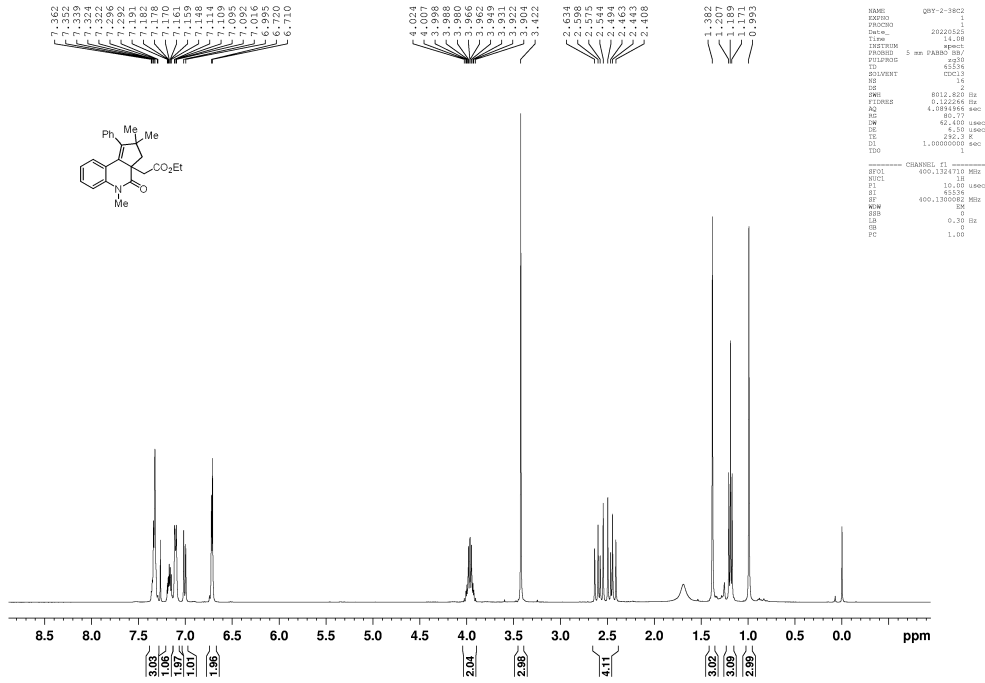

```

NAME          QM7-2-38C2
EXPNO         1
PROCNO       1
Date_         20220528
Time         14.48
INSTRUM      spect
PROBHD1      5 mm PABBO
PULPROG      zgpg30
TD           65536
SOLVENT      CDCl3
NS           15
DS           2
SWH          8012.820 MHz
F2 (kHz)     7.2224834
AQ          1.0814934 sec
RG           480.32
WDW          EM
SSB          0
LB           0.400 MHz
GB           0
PC           1.00
===== CHANNEL f1 =====
NUC1          13C
P1           12.00 usec
PT           65536
SFO1         100.6261818 MHz
WDW          EM
SSB          0
LB           0.400 MHz
GB           0
PC           1.00
  
```

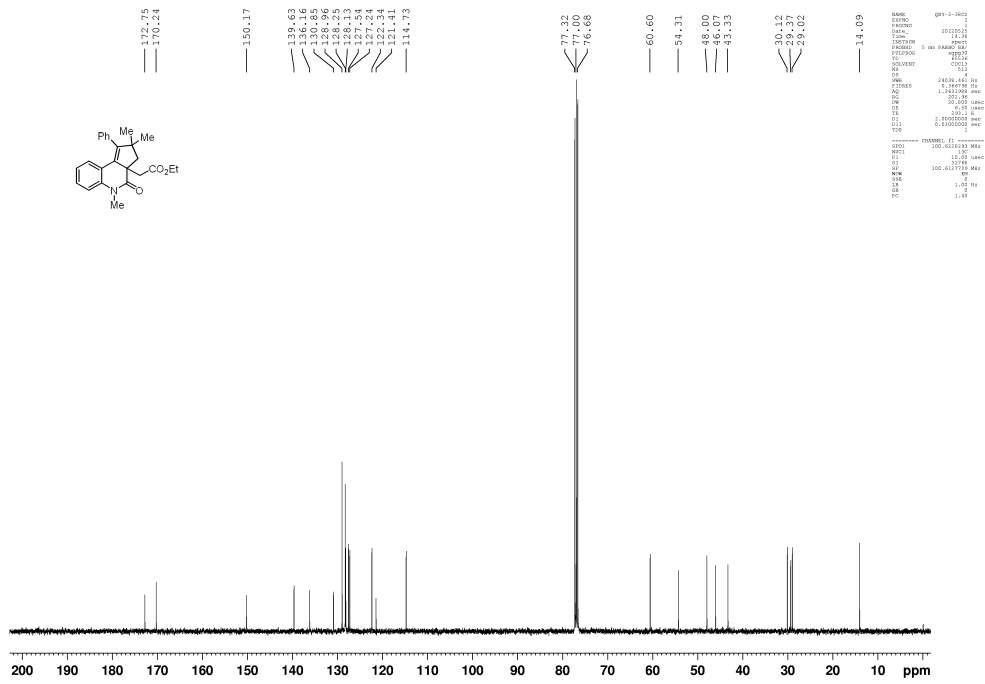

```

NAME          QM7-2-38C2
EXPNO         1
PROCNO       1
Date_         20220528
Time         14.48
INSTRUM      spect
PROBHD1      5 mm PABBO
PULPROG      zgpg30
TD           65536
SOLVENT      CDCl3
NS           15
DS           2
SWH          25000.620 MHz
F2 (kHz)     100.6261818
AQ          1.0814934 sec
RG           480.32
WDW          EM
SSB          0
LB           0.400 MHz
GB           0
PC           1.00
===== CHANNEL f1 =====
NUC1          13C
P1           12.00 usec
PT           65536
SFO1         100.6261818 MHz
WDW          EM
SSB          0
LB           0.400 MHz
GB           0
PC           1.00
  
```
